# Supplementary material for: GPU-accelerated city-scale urban flood forecasting for real-time decision-making
Source: Research Square preprint supplement (doi:10.21203/rs.3.rs-8515158/v1), 2026-01-12
Supplement: Supplementary file 1 [file bab1697a4d441b32fd70bd10.docx]

**Supplementary Material**

1. **Performance of models for different census tracts**, an extension of Table 2 mentioned in the main manuscript.

**Table S1 | Model comparison at census track level.** Comparison of GPU-based Synxflow CPU-based SWMM–HEC models with CNN-SAR observations for census tracts in Chicago Metro Area for the July 2, 2023, flood event.

| **GEOID** | **NAMELSAD10** | **Better Model** | **Model Type** | | |
| --- | --- | --- | --- | --- | --- |
| **HAND** | **SWMM-HEC** | **GPU** |
| 17031814100 | Census Tract 8141 | GPU | 0.41 | 0.45 | 0.61 |
| 17031610300 | Census Tract 6103 | GPU | 0.37 | 0.42 | 0.55 |
| 17031580400 | Census Tract 5804 | GPU | 0.35 | 0.37 | 0.51 |
| 17031670500 | Census Tract 6705 | GPU | 0.34 | 0.42 | 0.54 |
| 17031843800 | Census Tract 8438 | GPU | 0.33 | 0.41 | 0.59 |
| 17031611000 | Census Tract 6110 | GPU | 0.32 | 0.39 | 0.61 |
| 17031570100 | Census Tract 5701 | GPU | 0.32 | 0.38 | 0.48 |
| 17031630200 | Census Tract 6302 | GPU | 0.32 | 0.31 | 0.64 |
| 17031820901 | Census Tract 8209.01 | GPU | 0.31 | 0.39 | 0.50 |
| 17031700100 | Census Tract 7001 | GPU | 0.30 | 0.36 | 0.55 |
| 17031980100 | Census Tract 9801 | GPU | 0.29 | 0.35 | 0.47 |
| 17031825801 | Census Tract 8258.01 | GPU | 0.29 | 0.34 | 0.50 |
| 17031802609 | Census Tract 8026.09 | GPU | 0.29 | 0.42 | 0.44 |
| 17031291600 | Census Tract 2916 | GPU | 0.29 | 0.37 | 0.60 |
| 17031827500 | Census Tract 8275 | GPU | 0.29 | 0.41 | 0.51 |
| 17031842600 | Census Tract 8426 | GPU | 0.28 | 0.38 | 0.54 |
| 17031570200 | Census Tract 5702 | GPU | 0.28 | 0.37 | 0.58 |
| 17031843400 | Census Tract 8434 | GPU | 0.27 | 0.43 | 0.58 |
| 17031807800 | Census Tract 8078 | GPU | 0.27 | 0.41 | 0.44 |
| 17031690500 | Census Tract 6905 | GPU | 0.27 | 0.37 | 0.43 |
| 17031828506 | Census Tract 8285.06 | GPU | 0.27 | 0.28 | 0.51 |
| 17031823001 | Census Tract 8230.01 | GPU | 0.27 | 0.39 | 0.54 |
| 17031813301 | Census Tract 8133.01 | GPU | 0.26 | 0.35 | 0.43 |
| 17031820800 | Census Tract 8208 | GPU | 0.26 | 0.37 | 0.53 |
| 17031835600 | Census Tract 8356 | GPU | 0.26 | 0.38 | 0.42 |
| 17031842900 | Census Tract 8429 | GPU | 0.26 | 0.35 | 0.50 |
| 17031813801 | Census Tract 8138.01 | GPU | 0.26 | 0.36 | 0.66 |
| 17031760801 | Census Tract 7608.01 | GPU | 0.26 | 0.42 | 0.51 |
| 17031820400 | Census Tract 8204 | GPU | 0.26 | 0.38 | 0.46 |
| 17031650500 | Census Tract 6505 | GPU | 0.26 | 0.38 | 0.46 |
| 17031801901 | Census Tract 8019.01 | GPU | 0.25 | 0.41 | 0.42 |
| 17031841300 | Census Tract 8413 | GPU | 0.25 | 0.39 | 0.43 |
| 17031814200 | Census Tract 8142 | GPU | 0.25 | 0.41 | 0.57 |
| 17031805901 | Census Tract 8059.01 | GPU | 0.25 | 0.43 | 0.60 |
| 17031840000 | Census Tract 8400 | GPU | 0.25 | 0.25 | 0.41 |
| 17031830500 | Census Tract 8305 | GPU | 0.25 | 0.41 | 0.40 |
| 17031824400 | Census Tract 8244 | GPU | 0.25 | 0.37 | 0.51 |
| 17031802300 | Census Tract 8023 | GPU | 0.24 | 0.38 | 0.44 |
| 17031826301 | Census Tract 8263.01 | GPU | 0.24 | 0.33 | 0.45 |
| 17031826000 | Census Tract 8260 | GPU | 0.24 | 0.37 | 0.47 |
| 17031842400 | Census Tract 8424 | GPU | 0.24 | 0.33 | 0.54 |
| 17031510300 | Census Tract 5103 | GPU | 0.24 | 0.42 | 0.58 |
| 17031820902 | Census Tract 8209.02 | GPU | 0.24 | 0.36 | 0.47 |
| 17031813302 | Census Tract 8133.02 | GPU | 0.24 | 0.33 | 0.42 |
| 17031835200 | Census Tract 8352 | GPU | 0.24 | 0.36 | 0.39 |
| 17031801702 | Census Tract 8017.02 | GPU | 0.24 | 0.40 | 0.45 |
| 17031820502 | Census Tract 8205.02 | GPU | 0.24 | 0.34 | 0.40 |
| 17031842800 | Census Tract 8428 | GPU | 0.24 | 0.36 | 0.49 |
| 17031580100 | Census Tract 5801 | GPU | 0.23 | 0.35 | 0.57 |
| 17031251700 | Census Tract 2517 | GPU | 0.23 | 0.40 | 0.70 |
| 17031170100 | Census Tract 1701 | GPU | 0.23 | 0.41 | 0.47 |
| 17031838100 | Census Tract 8381 | GPU | 0.23 | 0.40 | 0.44 |
| 17031340500 | Census Tract 3405 | GPU | 0.23 | 0.32 | 0.44 |
| 17031560100 | Census Tract 5601 | GPU | 0.23 | 0.39 | 0.50 |
| 17031820700 | Census Tract 8207 | GPU | 0.23 | 0.40 | 0.42 |
| 17031831300 | Census Tract 8313 | GPU | 0.23 | 0.37 | 0.39 |
| 17031630100 | Census Tract 6301 | GPU | 0.23 | 0.37 | 0.62 |
| 17031806900 | Census Tract 8069 | GPU | 0.23 | 0.39 | 0.45 |
| 17031320600 | Census Tract 3206 | GPU | 0.23 | 0.39 | 0.42 |
| 17031240900 | Census Tract 2409 | GPU | 0.23 | 0.36 | 0.53 |
| 17031260500 | Census Tract 2605 | GPU | 0.23 | 0.33 | 0.44 |
| 17031580300 | Census Tract 5803 | GPU | 0.23 | 0.31 | 0.62 |
| 17031808301 | Census Tract 8083.01 | GPU | 0.23 | 0.42 | 0.42 |
| 17031816200 | Census Tract 8162 | GPU | 0.23 | 0.34 | 0.49 |
| 17031806002 | Census Tract 8060.02 | GPU | 0.23 | 0.36 | 0.52 |
| 17031243500 | Census Tract 2435 | GPU | 0.23 | 0.38 | 0.36 |
| 17031822102 | Census Tract 8221.02 | GPU | 0.23 | 0.34 | 0.56 |
| 17031827901 | Census Tract 8279.01 | GPU | 0.23 | 0.30 | 0.47 |
| 17031822801 | Census Tract 8228.01 | GPU | 0.23 | 0.32 | 0.50 |
| 17031580200 | Census Tract 5802 | GPU | 0.23 | 0.34 | 0.63 |
| 17031252201 | Census Tract 2522.01 | GPU | 0.22 | 0.35 | 0.40 |
| 17031805702 | Census Tract 8057.02 | GPU | 0.22 | 0.43 | 0.53 |
| 17031271300 | Census Tract 2713 | GPU | 0.22 | 0.42 | 0.46 |
| 17031810600 | Census Tract 8106 | GPU | 0.22 | 0.39 | 0.41 |
| 17031822400 | Census Tract 8224 | GPU | 0.22 | 0.38 | 0.48 |
| 17031826902 | Census Tract 8269.02 | GPU | 0.22 | 0.37 | 0.64 |
| 17031808500 | Census Tract 8085 | GPU | 0.22 | 0.40 | 0.49 |
| 17031840400 | Census Tract 8404 | GPU | 0.22 | 0.33 | 0.44 |
| 17031834000 | Census Tract 8340 | GPU | 0.22 | 0.36 | 0.40 |
| 17031800900 | Census Tract 8009 | GPU | 0.22 | 0.32 | 0.65 |
| 17031842200 | Census Tract 8422 | GPU | 0.22 | 0.30 | 0.38 |
| 17031540102 | Census Tract 5401.02 | GPU | 0.22 | 0.37 | 0.39 |
| 17031811200 | Census Tract 8112 | GPU | 0.22 | 0.38 | 0.41 |
| 17031822900 | Census Tract 8229 | GPU | 0.22 | 0.36 | 0.42 |
| 17031620200 | Census Tract 6202 | GPU | 0.22 | 0.27 | 0.66 |
| 17031814500 | Census Tract 8145 | GPU | 0.22 | 0.31 | 0.45 |
| 17031827600 | Census Tract 8276 | GPU | 0.22 | 0.33 | 0.67 |
| 17031822602 | Census Tract 8226.02 | GPU | 0.22 | 0.28 | 0.63 |
| 17031800700 | Census Tract 8007 | GPU | 0.22 | 0.37 | 0.46 |
| 17031827200 | Census Tract 8272 | GPU | 0.22 | 0.35 | 0.41 |
| 17031826901 | Census Tract 8269.01 | GPU | 0.22 | 0.33 | 0.64 |
| 17031630300 | Census Tract 6303 | GPU | 0.22 | 0.29 | 0.46 |
| 17031821002 | Census Tract 8210.02 | GPU | 0.22 | 0.29 | 0.51 |
| 17031837400 | Census Tract 8374 | GPU | 0.22 | 0.34 | 0.43 |
| 17031670200 | Census Tract 6702 | GPU | 0.22 | 0.29 | 0.75 |
| 17031838600 | Census Tract 8386 | GPU | 0.22 | 0.37 | 0.55 |
| 17031835500 | Census Tract 8355 | GPU | 0.22 | 0.38 | 0.39 |
| 17031808002 | Census Tract 8080.02 | GPU | 0.22 | 0.36 | 0.54 |
| 17031827802 | Census Tract 8278.02 | GPU | 0.22 | 0.30 | 0.53 |
| 17031827100 | Census Tract 8271 | GPU | 0.22 | 0.36 | 0.56 |
| 17031814300 | Census Tract 8143 | GPU | 0.22 | 0.31 | 0.36 |
| 17031260400 | Census Tract 2604 | GPU | 0.21 | 0.35 | 0.50 |
| 17031809700 | Census Tract 8097 | GPU | 0.21 | 0.43 | 0.59 |
| 17031760802 | Census Tract 7608.02 | GPU | 0.21 | 0.49 | 0.52 |
| 17031814400 | Census Tract 8144 | GPU | 0.21 | 0.31 | 0.43 |
| 17031807600 | Census Tract 8076 | GPU | 0.21 | 0.36 | 0.54 |
| 17031828701 | Census Tract 8287.01 | GPU | 0.21 | 0.45 | 0.45 |
| 17031816100 | Census Tract 8161 | GPU | 0.21 | 0.43 | 0.43 |
| 17031260300 | Census Tract 2603 | GPU | 0.21 | 0.41 | 0.52 |
| 17031251000 | Census Tract 2510 | GPU | 0.21 | 0.34 | 0.64 |
| 17031810301 | Census Tract 8103.01 | GPU | 0.21 | 0.36 | 0.44 |
| 17031800800 | Census Tract 8008 | GPU | 0.21 | 0.40 | 0.48 |
| 17031805801 | Census Tract 8058.01 | GPU | 0.21 | 0.42 | 0.48 |
| 17031822701 | Census Tract 8227.01 | GPU | 0.21 | 0.38 | 0.48 |
| 17031826800 | Census Tract 8268 | GPU | 0.21 | 0.39 | 0.40 |
| 17031834800 | Census Tract 8348 | GPU | 0.21 | 0.34 | 0.38 |
| 17031807900 | Census Tract 8079 | GPU | 0.21 | 0.40 | 0.53 |
| 17031560200 | Census Tract 5602 | GPU | 0.21 | 0.28 | 0.77 |
| 17031671400 | Census Tract 6714 | GPU | 0.21 | 0.41 | 0.57 |
| 17031480500 | Census Tract 4805 | GPU | 0.21 | 0.35 | 0.47 |
| 17031691500 | Census Tract 6915 | GPU | 0.21 | 0.32 | 0.61 |
| 17031821102 | Census Tract 8211.02 | GPU | 0.21 | 0.34 | 0.38 |
| 17031827804 | Census Tract 8278.04 | GPU | 0.21 | 0.32 | 0.35 |
| 17031590700 | Census Tract 5907 | GPU | 0.21 | 0.41 | 0.49 |
| 17031681000 | Census Tract 6810 | GPU | 0.21 | 0.32 | 0.65 |
| 17031210800 | Census Tract 2108 | GPU | 0.21 | 0.24 | 0.72 |
| 17031460200 | Census Tract 4602 | GPU | 0.21 | 0.33 | 0.62 |
| 17031824701 | Census Tract 8247.01 | GPU | 0.21 | 0.39 | 0.51 |
| 17031802610 | Census Tract 8026.1 | GPU | 0.21 | 0.46 | 0.47 |
| 17031292500 | Census Tract 2925 | GPU | 0.21 | 0.35 | 0.37 |
| 17031811100 | Census Tract 8111 | GPU | 0.21 | 0.38 | 0.50 |
| 17031491400 | Census Tract 4914 | GPU | 0.21 | 0.40 | 0.50 |
| 17031821800 | Census Tract 8218 | GPU | 0.21 | 0.33 | 0.57 |
| 17031828000 | Census Tract 8280 | GPU | 0.21 | 0.36 | 0.47 |
| 17031827801 | Census Tract 8278.01 | GPU | 0.21 | 0.36 | 0.41 |
| 17031807200 | Census Tract 8072 | GPU | 0.21 | 0.42 | 0.48 |
| 17031691100 | Census Tract 6911 | GPU | 0.21 | 0.34 | 0.45 |
| 17031824300 | Census Tract 8243 | GPU | 0.21 | 0.39 | 0.43 |
| 17031824800 | Census Tract 8248 | GPU | 0.20 | 0.36 | 0.50 |
| 17031813701 | Census Tract 8137.01 | GPU | 0.20 | 0.31 | 0.37 |
| 17031822601 | Census Tract 8226.01 | GPU | 0.20 | 0.30 | 0.64 |
| 17031807100 | Census Tract 8071 | GPU | 0.20 | 0.42 | 0.45 |
| 17031040800 | Census Tract 408 | GPU | 0.20 | 0.34 | 0.77 |
| 17031700301 | Census Tract 7003.01 | GPU | 0.20 | 0.27 | 0.57 |
| 17031640400 | Census Tract 6404 | GPU | 0.20 | 0.27 | 0.62 |
| 17031834900 | Census Tract 8349 | GPU | 0.20 | 0.38 | 0.55 |
| 17031821001 | Census Tract 8210.01 | GPU | 0.20 | 0.30 | 0.32 |
| 17031292400 | Census Tract 2924 | GPU | 0.20 | 0.32 | 0.43 |
| 17031832300 | Census Tract 8323 | GPU | 0.20 | 0.25 | 0.57 |
| 17031824900 | Census Tract 8249 | GPU | 0.20 | 0.39 | 0.57 |
| 17031813500 | Census Tract 8135 | GPU | 0.20 | 0.28 | 0.39 |
| 17031430102 | Census Tract 4301.02 | GPU | 0.20 | 0.49 | 0.63 |
| 17031827300 | Census Tract 8273 | GPU | 0.20 | 0.41 | 0.68 |
| 17031823303 | Census Tract 8233.03 | GPU | 0.20 | 0.31 | 0.53 |
| 17031700200 | Census Tract 7002 | GPU | 0.20 | 0.27 | 0.57 |
| 17031834700 | Census Tract 8347 | GPU | 0.20 | 0.32 | 0.50 |
| 17031030703 | Census Tract 307.03 | GPU | 0.20 | 0.34 | 0.73 |
| 17031351500 | Census Tract 3515 | GPU | 0.20 | 0.24 | 0.38 |
| 17031823304 | Census Tract 8233.04 | GPU | 0.20 | 0.44 | 0.45 |
| 17031842300 | Census Tract 8423 | GPU | 0.20 | 0.30 | 0.36 |
| 17031510200 | Census Tract 5102 | GPU | 0.20 | 0.35 | 0.65 |
| 17031710300 | Census Tract 7103 | GPU | 0.20 | 0.31 | 0.44 |
| 17031310300 | Census Tract 3103 | GPU | 0.20 | 0.37 | 0.45 |
| 17031671500 | Census Tract 6715 | GPU | 0.20 | 0.35 | 0.47 |
| 17031191200 | Census Tract 1912 | GPU | 0.20 | 0.29 | 0.52 |
| 17031252202 | Census Tract 2522.02 | GPU | 0.20 | 0.43 | 0.50 |
| 17031843300 | Census Tract 8433 | GPU | 0.20 | 0.40 | 0.61 |
| 17031350100 | Census Tract 3501 | GPU | 0.20 | 0.35 | 0.41 |
| 17031671600 | Census Tract 6716 | GPU | 0.20 | 0.38 | 0.49 |
| 17031670900 | Census Tract 6709 | GPU | 0.20 | 0.33 | 0.55 |
| 17031271200 | Census Tract 2712 | GPU | 0.20 | 0.34 | 0.46 |
| 17031842100 | Census Tract 8421 | GPU | 0.20 | 0.37 | 0.49 |
| 17031301200 | Census Tract 3012 | GPU | 0.20 | 0.32 | 0.67 |
| 17031808001 | Census Tract 8080.01 | GPU | 0.20 | 0.41 | 0.43 |
| 17031807700 | Census Tract 8077 | GPU | 0.20 | 0.40 | 0.44 |
| 17031841600 | Census Tract 8416 | GPU | 0.20 | 0.36 | 0.74 |
| 17031813400 | Census Tract 8134 | GPU | 0.20 | 0.28 | 0.65 |
| 17031825700 | Census Tract 8257 | GPU | 0.20 | 0.34 | 0.44 |
| 17031271800 | Census Tract 2718 | GPU | 0.20 | 0.41 | 0.54 |
| 17031821101 | Census Tract 8211.01 | GPU | 0.20 | 0.30 | 0.36 |
| 17031822301 | Census Tract 8223.01 | GPU | 0.20 | 0.28 | 0.41 |
| 17031826202 | Census Tract 8262.02 | GPU | 0.20 | 0.27 | 0.44 |
| 17031841800 | Census Tract 8418 | GPU | 0.20 | 0.37 | 0.54 |
| 17031020701 | Census Tract 207.01 | GPU | 0.20 | 0.29 | 0.78 |
| 17031801400 | Census Tract 8014 | GPU | 0.19 | 0.42 | 0.54 |
| 17031811000 | Census Tract 8110 | GPU | 0.19 | 0.34 | 0.47 |
| 17031809600 | Census Tract 8096 | GPU | 0.19 | 0.44 | 0.59 |
| 17031210400 | Census Tract 2104 | GPU | 0.19 | 0.32 | 0.52 |
| 17031838000 | Census Tract 8380 | GPU | 0.19 | 0.45 | 0.53 |
| 17031835000 | Census Tract 8350 | GPU | 0.19 | 0.26 | 0.57 |
| 17031740400 | Census Tract 7404 | GPU | 0.19 | 0.32 | 0.42 |
| 17031828505 | Census Tract 8285.05 | GPU | 0.19 | 0.37 | 0.45 |
| 17031340400 | Census Tract 3404 | GPU | 0.19 | 0.37 | 0.45 |
| 17031410700 | Census Tract 4107 | GPU | 0.19 | 0.31 | 0.71 |
| 17031827400 | Census Tract 8274 | GPU | 0.19 | 0.36 | 0.58 |
| 17031290900 | Census Tract 2909 | GPU | 0.19 | 0.32 | 0.48 |
| 17031822000 | Census Tract 8220 | GPU | 0.19 | 0.27 | 0.41 |
| 17031671900 | Census Tract 6719 | GPU | 0.19 | 0.37 | 0.37 |
| 17031611900 | Census Tract 6119 | GPU | 0.19 | 0.37 | 0.63 |
| 17031170500 | Census Tract 1705 | GPU | 0.19 | 0.32 | 0.45 |
| 17031020301 | Census Tract 203.01 | GPU | 0.19 | 0.31 | 0.54 |
| 17031301803 | Census Tract 3018.03 | GPU | 0.19 | 0.30 | 0.33 |
| 17031400300 | Census Tract 4003 | GPU | 0.19 | 0.40 | 0.41 |
| 17031710900 | Census Tract 7109 | GPU | 0.19 | 0.30 | 0.44 |
| 17031470100 | Census Tract 4701 | GPU | 0.19 | 0.33 | 0.51 |
| 17031760803 | Census Tract 7608.03 | GPU | 0.19 | 0.41 | 0.42 |
| 17031530100 | Census Tract 5301 | GPU | 0.19 | 0.38 | 0.56 |
| 17031670100 | Census Tract 6701 | GPU | 0.19 | 0.31 | 0.77 |
| 17031836800 | Census Tract 8368 | GPU | 0.19 | 0.38 | 0.39 |
| 17031671300 | Census Tract 6713 | GPU | 0.19 | 0.29 | 0.70 |
| 17031838700 | Census Tract 8387 | GPU | 0.19 | 0.36 | 0.38 |
| 17031830900 | Census Tract 8309 | GPU | 0.19 | 0.32 | 0.62 |
| 17031811900 | Census Tract 8119 | GPU | 0.19 | 0.44 | 0.52 |
| 17031430300 | Census Tract 4303 | GPU | 0.19 | 0.44 | 0.48 |
| 17031300600 | Census Tract 3006 | GPU | 0.19 | 0.28 | 0.64 |
| 17031824702 | Census Tract 8247.02 | GPU | 0.19 | 0.38 | 0.48 |
| 17031351400 | Census Tract 3514 | GPU | 0.19 | 0.29 | 0.52 |
| 17031611700 | Census Tract 6117 | GPU | 0.19 | 0.25 | 0.81 |
| 17031510100 | Census Tract 5101 | GPU | 0.19 | 0.35 | 0.41 |
| 17031251800 | Census Tract 2518 | GPU | 0.19 | 0.35 | 0.40 |
| 17031560400 | Census Tract 5604 | GPU | 0.19 | 0.25 | 0.45 |
| 17031711500 | Census Tract 7115 | GPU | 0.19 | 0.32 | 0.55 |
| 17031200200 | Census Tract 2002 | GPU | 0.19 | 0.36 | 0.48 |
| 17031430900 | Census Tract 4309 | GPU | 0.19 | 0.33 | 0.50 |
| 17031825900 | Census Tract 8259 | GPU | 0.19 | 0.27 | 0.67 |
| 17031460302 | Census Tract 4603.02 | GPU | 0.19 | 0.30 | 0.76 |
| 17031822302 | Census Tract 8223.02 | GPU | 0.19 | 0.34 | 0.45 |
| 17031806600 | Census Tract 8066 | GPU | 0.19 | 0.41 | 0.42 |
| 17031130100 | Census Tract 1301 | GPU | 0.19 | 0.39 | 0.41 |
| 17031827902 | Census Tract 8279.02 | GPU | 0.19 | 0.30 | 0.49 |
| 17031450300 | Census Tract 4503 | GPU | 0.19 | 0.30 | 0.50 |
| 17031611500 | Census Tract 6115 | GPU | 0.19 | 0.27 | 0.70 |
| 17031826303 | Census Tract 8263.03 | GPU | 0.18 | 0.29 | 0.42 |
| 17031440800 | Census Tract 4408 | GPU | 0.18 | 0.24 | 0.60 |
| 17031700302 | Census Tract 7003.02 | GPU | 0.18 | 0.23 | 0.37 |
| 17031740200 | Census Tract 7402 | GPU | 0.18 | 0.30 | 0.37 |
| 17031670700 | Census Tract 6707 | GPU | 0.18 | 0.38 | 0.47 |
| 17031843100 | Census Tract 8431 | GPU | 0.18 | 0.35 | 0.62 |
| 17031210900 | Census Tract 2109 | GPU | 0.18 | 0.21 | 0.72 |
| 17031280800 | Census Tract 2808 | GPU | 0.18 | 0.34 | 0.38 |
| 17031230300 | Census Tract 2303 | GPU | 0.18 | 0.29 | 0.67 |
| 17031251900 | Census Tract 2519 | GPU | 0.18 | 0.35 | 0.37 |
| 17031440900 | Census Tract 4409 | GPU | 0.18 | 0.29 | 0.65 |
| 17031570300 | Census Tract 5703 | GPU | 0.18 | 0.25 | 0.44 |
| 17031222600 | Census Tract 2226 | GPU | 0.18 | 0.31 | 0.63 |
| 17031190100 | Census Tract 1901 | GPU | 0.18 | 0.30 | 0.73 |
| 17031570500 | Census Tract 5705 | GPU | 0.18 | 0.25 | 0.34 |
| 17031420500 | Census Tract 4205 | GPU | 0.18 | 0.35 | 0.36 |
| 17031838300 | Census Tract 8383 | GPU | 0.18 | 0.25 | 0.42 |
| 17031833900 | Census Tract 8339 | GPU | 0.18 | 0.36 | 0.43 |
| 17031271400 | Census Tract 2714 | GPU | 0.18 | 0.40 | 0.47 |
| 17031814800 | Census Tract 8148 | GPU | 0.18 | 0.31 | 0.41 |
| 17031681300 | Census Tract 6813 | GPU | 0.18 | 0.41 | 0.52 |
| 17031770902 | Census Tract 7709.02 | GPU | 0.18 | 0.32 | 0.37 |
| 17031222900 | Census Tract 2229 | GPU | 0.18 | 0.25 | 0.55 |
| 17031420200 | Census Tract 4202 | GPU | 0.18 | 0.31 | 0.43 |
| 17031310400 | Census Tract 3104 | GPU | 0.18 | 0.34 | 0.46 |
| 17031843600 | Census Tract 8436 | GPU | 0.18 | 0.32 | 0.50 |
| 17031821700 | Census Tract 8217 | GPU | 0.18 | 0.29 | 0.54 |
| 17031700401 | Census Tract 7004.01 | GPU | 0.18 | 0.34 | 0.50 |
| 17031809200 | Census Tract 8092 | GPU | 0.18 | 0.33 | 0.47 |
| 17031770800 | Census Tract 7708 | GPU | 0.18 | 0.36 | 0.44 |
| 17031691200 | Census Tract 6912 | GPU | 0.18 | 0.34 | 0.57 |
| 17031843700 | Census Tract 8437 | GPU | 0.18 | 0.25 | 0.71 |
| 17031480300 | Census Tract 4803 | GPU | 0.18 | 0.25 | 0.58 |
| 17031231500 | Census Tract 2315 | GPU | 0.18 | 0.33 | 0.42 |
| 17031815200 | Census Tract 8152 | GPU | 0.18 | 0.30 | 0.63 |
| 17031110100 | Census Tract 1101 | GPU | 0.18 | 0.34 | 0.36 |
| 17031834300 | Census Tract 8343 | GPU | 0.18 | 0.30 | 0.50 |
| 17031821402 | Census Tract 8214.02 | GPU | 0.18 | 0.37 | 0.46 |
| 17031835100 | Census Tract 8351 | GPU | 0.18 | 0.29 | 0.54 |
| 17031660700 | Census Tract 6607 | GPU | 0.18 | 0.37 | 0.48 |
| 17031836700 | Census Tract 8367 | GPU | 0.18 | 0.29 | 0.47 |
| 17031670800 | Census Tract 6708 | GPU | 0.18 | 0.31 | 0.68 |
| 17031814900 | Census Tract 8149 | GPU | 0.18 | 0.25 | 0.53 |
| 17031837000 | Census Tract 8370 | GPU | 0.18 | 0.41 | 0.42 |
| 17031813600 | Census Tract 8136 | GPU | 0.18 | 0.23 | 0.75 |
| 17031837100 | Census Tract 8371 | GPU | 0.18 | 0.31 | 0.46 |
| 17031836600 | Census Tract 8366 | GPU | 0.18 | 0.26 | 0.62 |
| 17031010600 | Census Tract 106 | GPU | 0.18 | 0.43 | 0.42 |
| 17031231200 | Census Tract 2312 | GPU | 0.18 | 0.28 | 0.66 |
| 17031650400 | Census Tract 6504 | GPU | 0.18 | 0.26 | 0.29 |
| 17031640100 | Census Tract 6401 | GPU | 0.18 | 0.28 | 0.33 |
| 17031840300 | Census Tract 8403 | GPU | 0.18 | 0.25 | 0.63 |
| 17031381700 | Census Tract 3817 | GPU | 0.18 | 0.28 | 0.38 |
| 17031230600 | Census Tract 2306 | GPU | 0.18 | 0.30 | 0.42 |
| 17031832500 | Census Tract 8325 | GPU | 0.18 | 0.31 | 0.54 |
| 17031660301 | Census Tract 6603.01 | GPU | 0.18 | 0.25 | 0.32 |
| 17031292200 | Census Tract 2922 | GPU | 0.17 | 0.29 | 0.45 |
| 17031670400 | Census Tract 6704 | GPU | 0.17 | 0.32 | 0.71 |
| 17031838200 | Census Tract 8382 | GPU | 0.17 | 0.44 | 0.55 |
| 17031620100 | Census Tract 6201 | GPU | 0.17 | 0.21 | 0.74 |
| 17031841200 | Census Tract 8412 | GPU | 0.17 | 0.30 | 0.47 |
| 17031670300 | Census Tract 6703 | GPU | 0.17 | 0.29 | 0.79 |
| 17031812200 | Census Tract 8122 | GPU | 0.17 | 0.36 | 0.38 |
| 17031250200 | Census Tract 2502 | GPU | 0.17 | 0.33 | 0.38 |
| 17031700402 | Census Tract 7004.02 | GPU | 0.17 | 0.32 | 0.43 |
| 17031611200 | Census Tract 6112 | GPU | 0.17 | 0.37 | 0.66 |
| 17031430600 | Census Tract 4306 | GPU | 0.17 | 0.35 | 0.55 |
| 17031590500 | Census Tract 5905 | GPU | 0.17 | 0.36 | 0.53 |
| 17031440600 | Census Tract 4406 | GPU | 0.17 | 0.25 | 0.70 |
| 17031823603 | Census Tract 8236.03 | GPU | 0.17 | 0.41 | 0.41 |
| 17031220500 | Census Tract 2205 | GPU | 0.17 | 0.42 | 0.51 |
| 17031807500 | Census Tract 8075 | GPU | 0.17 | 0.38 | 0.51 |
| 17031680600 | Census Tract 6806 | GPU | 0.17 | 0.30 | 0.74 |
| 17031660500 | Census Tract 6605 | GPU | 0.17 | 0.30 | 0.35 |
| 17031839900 | Census Tract 8399 | GPU | 0.17 | 0.30 | 0.60 |
| 17031691000 | Census Tract 6910 | GPU | 0.17 | 0.33 | 0.67 |
| 17031230500 | Census Tract 2305 | GPU | 0.17 | 0.32 | 0.52 |
| 17031640800 | Census Tract 6408 | GPU | 0.17 | 0.28 | 0.28 |
| 17031520600 | Census Tract 5206 | GPU | 0.17 | 0.28 | 0.66 |
| 17031730100 | Census Tract 7301 | GPU | 0.17 | 0.26 | 0.74 |
| 17031825802 | Census Tract 8258.02 | GPU | 0.17 | 0.23 | 0.72 |
| 17031430400 | Census Tract 4304 | GPU | 0.17 | 0.35 | 0.56 |
| 17031440102 | Census Tract 4401.02 | GPU | 0.17 | 0.28 | 0.66 |
| 17031681100 | Census Tract 6811 | GPU | 0.17 | 0.25 | 0.58 |
| 17031381400 | Census Tract 3814 | GPU | 0.17 | 0.30 | 0.40 |
| 17031611600 | Census Tract 6116 | GPU | 0.17 | 0.28 | 0.78 |
| 17031813900 | Census Tract 8139 | GPU | 0.17 | 0.28 | 0.71 |
| 17031821401 | Census Tract 8214.01 | GPU | 0.17 | 0.31 | 0.42 |
| 17031831100 | Census Tract 8311 | GPU | 0.17 | 0.33 | 0.54 |
| 17031815000 | Census Tract 8150 | GPU | 0.17 | 0.28 | 0.37 |
| 17031301600 | Census Tract 3016 | GPU | 0.17 | 0.24 | 0.82 |
| 17031490901 | Census Tract 4909.01 | GPU | 0.17 | 0.35 | 0.42 |
| 17031580502 | Census Tract 5805.02 | GPU | 0.17 | 0.26 | 0.66 |
| 17031661000 | Census Tract 6610 | GPU | 0.17 | 0.29 | 0.50 |
| 17031814000 | Census Tract 8140 | GPU | 0.17 | 0.30 | 0.55 |
| 17031260700 | Census Tract 2607 | GPU | 0.17 | 0.46 | 0.55 |
| 17031410100 | Census Tract 4101 | GPU | 0.17 | 0.48 | 0.48 |
| 17031690900 | Census Tract 6909 | GPU | 0.17 | 0.29 | 0.32 |
| 17031691300 | Census Tract 6913 | GPU | 0.17 | 0.29 | 0.70 |
| 17031815300 | Census Tract 8153 | GPU | 0.17 | 0.31 | 0.39 |
| 17031480400 | Census Tract 4804 | GPU | 0.17 | 0.41 | 0.43 |
| 17031491000 | Census Tract 4910 | GPU | 0.17 | 0.36 | 0.41 |
| 17031812600 | Census Tract 8126 | GPU | 0.17 | 0.41 | 0.47 |
| 17031251100 | Census Tract 2511 | GPU | 0.17 | 0.29 | 0.63 |
| 17031640500 | Census Tract 6405 | GPU | 0.17 | 0.26 | 0.43 |
| 17031560300 | Census Tract 5603 | GPU | 0.17 | 0.25 | 0.61 |
| 17031640700 | Census Tract 6407 | GPU | 0.17 | 0.34 | 0.43 |
| 17031130300 | Census Tract 1303 | GPU | 0.17 | 0.33 | 0.53 |
| 17031440300 | Census Tract 4403 | GPU | 0.17 | 0.25 | 0.75 |
| 17031150402 | Census Tract 1504.02 | GPU | 0.17 | 0.24 | 0.46 |
| 17031210700 | Census Tract 2107 | GPU | 0.17 | 0.20 | 0.69 |
| 17031640600 | Census Tract 6406 | GPU | 0.17 | 0.21 | 0.67 |
| 17031815500 | Census Tract 8155 | GPU | 0.17 | 0.30 | 0.43 |
| 17031810900 | Census Tract 8109 | GPU | 0.17 | 0.29 | 0.47 |
| 17031291200 | Census Tract 2912 | GPU | 0.16 | 0.30 | 0.33 |
| 17031020802 | Census Tract 208.02 | GPU | 0.16 | 0.30 | 0.80 |
| 17031834400 | Census Tract 8344 | GPU | 0.16 | 0.26 | 0.57 |
| 17031835700 | Census Tract 8357 | GPU | 0.16 | 0.26 | 0.54 |
| 17031711400 | Census Tract 7114 | GPU | 0.16 | 0.32 | 0.40 |
| 17031740300 | Census Tract 7403 | GPU | 0.16 | 0.30 | 0.35 |
| 17031817300 | Census Tract 8173 | GPU | 0.16 | 0.35 | 0.42 |
| 17031690400 | Census Tract 6904 | GPU | 0.16 | 0.33 | 0.60 |
| 17031680500 | Census Tract 6805 | GPU | 0.16 | 0.30 | 0.79 |
| 17031150502 | Census Tract 1505.02 | GPU | 0.16 | 0.28 | 0.46 |
| 17031200300 | Census Tract 2003 | GPU | 0.16 | 0.25 | 0.65 |
| 17031710400 | Census Tract 7104 | GPU | 0.16 | 0.25 | 0.46 |
| 17031807400 | Census Tract 8074 | GPU | 0.16 | 0.41 | 0.45 |
| 17031301701 | Census Tract 3017.01 | GPU | 0.16 | 0.26 | 0.68 |
| 17031841700 | Census Tract 8417 | GPU | 0.16 | 0.32 | 0.52 |
| 17031802505 | Census Tract 8025.05 | GPU | 0.16 | 0.37 | 0.50 |
| 17031660900 | Census Tract 6609 | GPU | 0.16 | 0.31 | 0.37 |
| 17031251300 | Census Tract 2513 | GPU | 0.16 | 0.28 | 0.31 |
| 17031612100 | Census Tract 6121 | GPU | 0.16 | 0.30 | 0.82 |
| 17031160602 | Census Tract 1606.02 | GPU | 0.16 | 0.29 | 0.65 |
| 17031030706 | Census Tract 307.06 | GPU | 0.16 | 0.38 | 0.53 |
| 17031711100 | Census Tract 7111 | GPU | 0.16 | 0.25 | 0.40 |
| 17031841100 | Census Tract 8411 | GPU | 0.16 | 0.42 | 0.43 |
| 17031650302 | Census Tract 6503.02 | GPU | 0.16 | 0.23 | 0.37 |
| 17031120400 | Census Tract 1204 | GPU | 0.16 | 0.34 | 0.41 |
| 17031840700 | Census Tract 8407 | GPU | 0.16 | 0.29 | 0.66 |
| 17031221200 | Census Tract 2212 | GPU | 0.16 | 0.37 | 0.58 |
| 17031300900 | Census Tract 3009 | GPU | 0.16 | 0.26 | 0.75 |
| 17031210100 | Census Tract 2101 | GPU | 0.16 | 0.20 | 0.76 |
| 17031730202 | Census Tract 7302.02 | GPU | 0.16 | 0.28 | 0.38 |
| 17031310200 | Census Tract 3102 | GPU | 0.16 | 0.37 | 0.39 |
| 17031834200 | Census Tract 8342 | GPU | 0.16 | 0.29 | 0.53 |
| 17031231100 | Census Tract 2311 | GPU | 0.16 | 0.24 | 0.66 |
| 17031150200 | Census Tract 1502 | GPU | 0.16 | 0.35 | 0.42 |
| 17031421200 | Census Tract 4212 | GPU | 0.16 | 0.30 | 0.69 |
| 17031710200 | Census Tract 7102 | GPU | 0.16 | 0.28 | 0.57 |
| 17031560800 | Census Tract 5608 | GPU | 0.16 | 0.36 | 0.40 |
| 17031250800 | Census Tract 2508 | GPU | 0.16 | 0.29 | 0.54 |
| 17031191302 | Census Tract 1913.02 | GPU | 0.16 | 0.25 | 0.41 |
| 17031812302 | Census Tract 8123.02 | GPU | 0.16 | 0.38 | 0.43 |
| 17031650200 | Census Tract 6502 | GPU | 0.16 | 0.21 | 0.34 |
| 17031390300 | Census Tract 3903 | GPU | 0.16 | 0.42 | 0.43 |
| 17031710800 | Census Tract 7108 | GPU | 0.16 | 0.25 | 0.52 |
| 17031815100 | Census Tract 8151 | GPU | 0.16 | 0.25 | 0.26 |
| 17031150501 | Census Tract 1505.01 | GPU | 0.16 | 0.26 | 0.69 |
| 17031140500 | Census Tract 1405 | GPU | 0.16 | 0.27 | 0.33 |
| 17031260200 | Census Tract 2602 | GPU | 0.16 | 0.32 | 0.57 |
| 17031310600 | Census Tract 3106 | GPU | 0.16 | 0.33 | 0.52 |
| 17031420800 | Census Tract 4208 | GPU | 0.16 | 0.29 | 0.32 |
| 17031480100 | Census Tract 4801 | GPU | 0.16 | 0.19 | 0.79 |
| 17031611800 | Census Tract 6118 | GPU | 0.16 | 0.25 | 0.78 |
| 17031220702 | Census Tract 2207.02 | GPU | 0.16 | 0.32 | 0.50 |
| 17031160501 | Census Tract 1605.01 | GPU | 0.16 | 0.25 | 0.56 |
| 17031160900 | Census Tract 1609 | GPU | 0.16 | 0.43 | 0.69 |
| 17031220300 | Census Tract 2203 | GPU | 0.16 | 0.34 | 0.68 |
| 17031200401 | Census Tract 2004.01 | GPU | 0.16 | 0.30 | 0.53 |
| 17031490600 | Census Tract 4906 | GPU | 0.16 | 0.28 | 0.52 |
| 17031251400 | Census Tract 2514 | GPU | 0.16 | 0.34 | 0.62 |
| 17031611400 | Census Tract 6114 | GPU | 0.16 | 0.31 | 0.78 |
| 17031620300 | Census Tract 6203 | GPU | 0.16 | 0.25 | 0.51 |
| 17031740100 | Census Tract 7401 | GPU | 0.16 | 0.27 | 0.32 |
| 17031611100 | Census Tract 6111 | GPU | 0.16 | 0.29 | 0.75 |
| 17031120300 | Census Tract 1203 | GPU | 0.16 | 0.35 | 0.36 |
| 17031031300 | Census Tract 313 | GPU | 0.16 | 0.47 | 0.55 |
| 17031610400 | Census Tract 6104 | GPU | 0.16 | 0.27 | 0.57 |
| 17031310700 | Census Tract 3107 | GPU | 0.16 | 0.39 | 0.63 |
| 17031161000 | Census Tract 1610 | GPU | 0.16 | 0.37 | 0.69 |
| 17031560700 | Census Tract 5607 | GPU | 0.16 | 0.34 | 0.42 |
| 17031030604 | Census Tract 306.04 | GPU | 0.16 | 0.37 | 0.50 |
| 17031610800 | Census Tract 6108 | GPU | 0.16 | 0.33 | 0.69 |
| 17031630900 | Census Tract 6309 | GPU | 0.16 | 0.27 | 0.33 |
| 17031612000 | Census Tract 6120 | GPU | 0.16 | 0.32 | 0.84 |
| 17031230400 | Census Tract 2304 | GPU | 0.16 | 0.23 | 0.48 |
| 17031030701 | Census Tract 307.01 | GPU | 0.16 | 0.29 | 0.77 |
| 17031252000 | Census Tract 2520 | GPU | 0.16 | 0.39 | 0.46 |
| 17031480200 | Census Tract 4802 | GPU | 0.15 | 0.21 | 0.79 |
| 17031700501 | Census Tract 7005.01 | GPU | 0.15 | 0.34 | 0.37 |
| 17031241200 | Census Tract 2412 | GPU | 0.15 | 0.30 | 0.81 |
| 17031301100 | Census Tract 3011 | GPU | 0.15 | 0.37 | 0.81 |
| 17031730500 | Census Tract 7305 | GPU | 0.15 | 0.35 | 0.51 |
| 17031814700 | Census Tract 8147 | GPU | 0.15 | 0.27 | 0.41 |
| 17031170600 | Census Tract 1706 | GPU | 0.15 | 0.22 | 0.78 |
| 17031191000 | Census Tract 1910 | GPU | 0.15 | 0.23 | 0.56 |
| 17031840100 | Census Tract 8401 | GPU | 0.15 | 0.26 | 0.42 |
| 17031750400 | Census Tract 7504 | GPU | 0.15 | 0.34 | 0.40 |
| 17031711000 | Census Tract 7110 | GPU | 0.15 | 0.31 | 0.53 |
| 17031828900 | Census Tract 8289 | GPU | 0.15 | 0.31 | 0.45 |
| 17031222500 | Census Tract 2225 | GPU | 0.15 | 0.28 | 0.72 |
| 17031160700 | Census Tract 1607 | GPU | 0.15 | 0.19 | 0.84 |
| 17031440101 | Census Tract 4401.01 | GPU | 0.15 | 0.21 | 0.82 |
| 17031500300 | Census Tract 5003 | GPU | 0.15 | 0.47 | 0.51 |
| 17031280900 | Census Tract 2809 | GPU | 0.15 | 0.36 | 0.49 |
| 17031251600 | Census Tract 2516 | GPU | 0.15 | 0.32 | 0.59 |
| 17031611300 | Census Tract 6113 | GPU | 0.15 | 0.32 | 0.55 |
| 17031411100 | Census Tract 4111 | GPU | 0.15 | 0.50 | 0.51 |
| 17031030102 | Census Tract 301.02 | GPU | 0.15 | 0.45 | 0.55 |
| 17031832600 | Census Tract 8326 | GPU | 0.15 | 0.37 | 0.39 |
| 17031839600 | Census Tract 8396 | GPU | 0.15 | 0.32 | 0.35 |
| 17031030603 | Census Tract 306.03 | GPU | 0.15 | 0.31 | 0.75 |
| 17031221300 | Census Tract 2213 | GPU | 0.15 | 0.35 | 0.72 |
| 17031620400 | Census Tract 6204 | GPU | 0.15 | 0.22 | 0.54 |
| 17031140602 | Census Tract 1406.02 | GPU | 0.15 | 0.36 | 0.38 |
| 17031110501 | Census Tract 1105.01 | GPU | 0.15 | 0.28 | 0.44 |
| 17031691400 | Census Tract 6914 | GPU | 0.15 | 0.25 | 0.36 |
| 17031660800 | Census Tract 6608 | GPU | 0.15 | 0.28 | 0.37 |
| 17031170800 | Census Tract 1708 | GPU | 0.15 | 0.25 | 0.49 |
| 17031220602 | Census Tract 2206.02 | GPU | 0.15 | 0.34 | 0.59 |
| 17031550100 | Census Tract 5501 | GPU | 0.15 | 0.28 | 0.33 |
| 17031440700 | Census Tract 4407 | GPU | 0.15 | 0.25 | 0.58 |
| 17031222700 | Census Tract 2227 | GPU | 0.15 | 0.36 | 0.40 |
| 17031070700 | Census Tract 707 | GPU | 0.15 | 0.21 | 0.67 |
| 17031490300 | Census Tract 4903 | GPU | 0.15 | 0.34 | 0.36 |
| 17031051100 | Census Tract 511 | GPU | 0.15 | 0.36 | 0.51 |
| 17031190602 | Census Tract 1906.02 | GPU | 0.15 | 0.25 | 0.37 |
| 17031160400 | Census Tract 1604 | GPU | 0.15 | 0.38 | 0.43 |
| 17031813802 | Census Tract 8138.02 | GPU | 0.15 | 0.33 | 0.81 |
| 17031710600 | Census Tract 7106 | GPU | 0.15 | 0.31 | 0.47 |
| 17031831700 | Census Tract 8317 | GPU | 0.15 | 0.27 | 0.60 |
| 17031250700 | Census Tract 2507 | GPU | 0.15 | 0.30 | 0.37 |
| 17031431301 | Census Tract 4313.01 | GPU | 0.15 | 0.28 | 0.77 |
| 17031839500 | Census Tract 8395 | GPU | 0.15 | 0.27 | 0.35 |
| 17031110502 | Census Tract 1105.02 | GPU | 0.15 | 0.31 | 0.45 |
| 17031221400 | Census Tract 2214 | GPU | 0.15 | 0.28 | 0.74 |
| 17031440202 | Census Tract 4402.02 | GPU | 0.15 | 0.29 | 0.48 |
| 17031020602 | Census Tract 206.02 | GPU | 0.15 | 0.29 | 0.83 |
| 17031640300 | Census Tract 6403 | GPU | 0.15 | 0.25 | 0.53 |
| 17031040700 | Census Tract 407 | GPU | 0.15 | 0.33 | 0.75 |
| 17031832200 | Census Tract 8322 | GPU | 0.15 | 0.25 | 0.56 |
| 17031381500 | Census Tract 3815 | GPU | 0.15 | 0.39 | 0.44 |
| 17031040401 | Census Tract 404.01 | GPU | 0.15 | 0.31 | 0.53 |
| 17031380700 | Census Tract 3807 | GPU | 0.15 | 0.36 | 0.43 |
| 17031812500 | Census Tract 8125 | GPU | 0.15 | 0.33 | 0.65 |
| 17031810800 | Census Tract 8108 | GPU | 0.15 | 0.37 | 0.44 |
| 17031580600 | Census Tract 5806 | GPU | 0.15 | 0.18 | 0.85 |
| 17031301702 | Census Tract 3017.02 | GPU | 0.15 | 0.23 | 0.79 |
| 17031630500 | Census Tract 6305 | GPU | 0.15 | 0.21 | 0.70 |
| 17031220400 | Census Tract 2204 | GPU | 0.15 | 0.29 | 0.61 |
| 17031841500 | Census Tract 8415 | GPU | 0.15 | 0.28 | 0.45 |
| 17031410200 | Census Tract 4102 | GPU | 0.15 | 0.32 | 0.82 |
| 17031160800 | Census Tract 1608 | GPU | 0.15 | 0.20 | 0.80 |
| 17031460600 | Census Tract 4606 | GPU | 0.15 | 0.38 | 0.74 |
| 17031140702 | Census Tract 1407.02 | GPU | 0.15 | 0.33 | 0.35 |
| 17031200402 | Census Tract 2004.02 | GPU | 0.15 | 0.22 | 0.65 |
| 17031010701 | Census Tract 107.01 | GPU | 0.14 | 0.44 | 0.44 |
| 17031813702 | Census Tract 8137.02 | GPU | 0.14 | 0.18 | 0.67 |
| 17031080400 | Census Tract 804 | GPU | 0.14 | 0.34 | 0.54 |
| 17031671200 | Census Tract 6712 | GPU | 0.14 | 0.29 | 0.50 |
| 17031420600 | Census Tract 4206 | GPU | 0.14 | 0.29 | 0.81 |
| 17031580700 | Census Tract 5807 | GPU | 0.14 | 0.17 | 0.86 |
| 17031490400 | Census Tract 4904 | GPU | 0.14 | 0.22 | 0.56 |
| 17031252102 | Census Tract 2521.02 | GPU | 0.14 | 0.32 | 0.44 |
| 17031681400 | Census Tract 6814 | GPU | 0.14 | 0.18 | 0.78 |
| 17031520300 | Census Tract 5203 | GPU | 0.14 | 0.25 | 0.57 |
| 17031180100 | Census Tract 1801 | GPU | 0.14 | 0.30 | 0.37 |
| 17031010201 | Census Tract 102.01 | GPU | 0.14 | 0.47 | 0.49 |
| 17031430101 | Census Tract 4301.01 | GPU | 0.14 | 0.28 | 0.66 |
| 17031242200 | Census Tract 2422 | GPU | 0.14 | 0.32 | 0.53 |
| 17031161200 | Census Tract 1612 | GPU | 0.14 | 0.31 | 0.51 |
| 17031020601 | Census Tract 206.01 | GPU | 0.14 | 0.23 | 0.84 |
| 17031710700 | Census Tract 7107 | GPU | 0.14 | 0.22 | 0.43 |
| 17031841400 | Census Tract 8414 | GPU | 0.14 | 0.24 | 0.64 |
| 17031081900 | Census Tract 819 | GPU | 0.14 | 0.24 | 0.58 |
| 17031161300 | Census Tract 1613 | GPU | 0.14 | 0.27 | 0.65 |
| 17031660400 | Census Tract 6604 | GPU | 0.14 | 0.23 | 0.31 |
| 17031241600 | Census Tract 2416 | GPU | 0.14 | 0.18 | 0.70 |
| 17031170700 | Census Tract 1707 | GPU | 0.14 | 0.25 | 0.37 |
| 17031410800 | Census Tract 4108 | GPU | 0.14 | 0.36 | 0.56 |
| 17031140200 | Census Tract 1402 | GPU | 0.14 | 0.30 | 0.49 |
| 17031660302 | Census Tract 6603.02 | GPU | 0.14 | 0.23 | 0.39 |
| 17031191100 | Census Tract 1911 | GPU | 0.14 | 0.30 | 0.37 |
| 17031190900 | Census Tract 1909 | GPU | 0.14 | 0.28 | 0.72 |
| 17031431200 | Census Tract 4312 | GPU | 0.14 | 0.31 | 0.46 |
| 17031310900 | Census Tract 3109 | GPU | 0.14 | 0.24 | 0.43 |
| 17031190702 | Census Tract 1907.02 | GPU | 0.14 | 0.23 | 0.42 |
| 17031260100 | Census Tract 2601 | GPU | 0.14 | 0.30 | 0.49 |
| 17031030800 | Census Tract 308 | GPU | 0.14 | 0.33 | 0.52 |
| 17031310500 | Census Tract 3105 | GPU | 0.14 | 0.39 | 0.43 |
| 17031460400 | Census Tract 4604 | GPU | 0.14 | 0.24 | 0.80 |
| 17031300500 | Census Tract 3005 | GPU | 0.14 | 0.27 | 0.38 |
| 17031150700 | Census Tract 1507 | GPU | 0.14 | 0.20 | 0.53 |
| 17031460500 | Census Tract 4605 | GPU | 0.14 | 0.32 | 0.63 |
| 17031151200 | Census Tract 1512 | GPU | 0.14 | 0.23 | 0.32 |
| 17031221500 | Census Tract 2215 | GPU | 0.14 | 0.37 | 0.61 |
| 17031040402 | Census Tract 404.02 | GPU | 0.14 | 0.32 | 0.47 |
| 17031282800 | Census Tract 2828 | GPU | 0.14 | 0.28 | 0.78 |
| 17031020801 | Census Tract 208.01 | GPU | 0.14 | 0.28 | 0.56 |
| 17031110300 | Census Tract 1103 | GPU | 0.14 | 0.25 | 0.52 |
| 17031300700 | Census Tract 3007 | GPU | 0.14 | 0.26 | 0.80 |
| 17031210501 | Census Tract 2105.01 | GPU | 0.14 | 0.38 | 0.38 |
| 17031282700 | Census Tract 2827 | GPU | 0.14 | 0.25 | 0.70 |
| 17031051400 | Census Tract 514 | GPU | 0.14 | 0.28 | 0.76 |
| 17031520500 | Census Tract 5205 | GPU | 0.14 | 0.23 | 0.70 |
| 17031060400 | Census Tract 604 | GPU | 0.14 | 0.35 | 0.36 |
| 17031630400 | Census Tract 6304 | GPU | 0.14 | 0.25 | 0.35 |
| 17031230700 | Census Tract 2307 | GPU | 0.14 | 0.20 | 0.53 |
| 17031831200 | Census Tract 8312 | GPU | 0.14 | 0.28 | 0.48 |
| 17031580800 | Census Tract 5808 | GPU | 0.14 | 0.19 | 0.86 |
| 17031140601 | Census Tract 1406.01 | GPU | 0.13 | 0.26 | 0.38 |
| 17031831900 | Census Tract 8319 | GPU | 0.13 | 0.29 | 0.33 |
| 17031190402 | Census Tract 1904.02 | GPU | 0.13 | 0.21 | 0.34 |
| 17031140800 | Census Tract 1408 | GPU | 0.13 | 0.36 | 0.47 |
| 17031190800 | Census Tract 1908 | GPU | 0.13 | 0.23 | 0.55 |
| 17031460700 | Census Tract 4607 | GPU | 0.13 | 0.34 | 0.47 |
| 17031222800 | Census Tract 2228 | GPU | 0.13 | 0.37 | 0.43 |
| 17031190300 | Census Tract 1903 | GPU | 0.13 | 0.22 | 0.33 |
| 17031031200 | Census Tract 312 | GPU | 0.13 | 0.21 | 0.63 |
| 17031650100 | Census Tract 6501 | GPU | 0.13 | 0.24 | 0.40 |
| 17031240800 | Census Tract 2408 | GPU | 0.13 | 0.24 | 0.55 |
| 17031840800 | Census Tract 8408 | GPU | 0.13 | 0.22 | 0.85 |
| 17031220902 | Census Tract 2209.02 | GPU | 0.13 | 0.27 | 0.43 |
| 17031150300 | Census Tract 1503 | GPU | 0.13 | 0.29 | 0.58 |
| 17031230800 | Census Tract 2308 | GPU | 0.13 | 0.24 | 0.50 |
| 17031440201 | Census Tract 4402.01 | GPU | 0.13 | 0.26 | 0.40 |
| 17031380100 | Census Tract 3801 | GPU | 0.13 | 0.31 | 0.49 |
| 17031630800 | Census Tract 6308 | GPU | 0.13 | 0.19 | 0.41 |
| 17031243000 | Census Tract 2430 | GPU | 0.13 | 0.23 | 0.65 |
| 17031200100 | Census Tract 2001 | GPU | 0.13 | 0.29 | 0.40 |
| 17031411200 | Census Tract 4112 | GPU | 0.13 | 0.36 | 0.50 |
| 17031010503 | Census Tract 105.03 | GPU | 0.13 | 0.35 | 0.50 |
| 17031243200 | Census Tract 2432 | GPU | 0.13 | 0.33 | 0.48 |
| 17031243300 | Census Tract 2433 | GPU | 0.13 | 0.32 | 0.45 |
| 17031050300 | Census Tract 503 | GPU | 0.13 | 0.28 | 0.86 |
| 17031243400 | Census Tract 2434 | GPU | 0.13 | 0.24 | 0.55 |
| 17031830004 | Census Tract 8300.04 | GPU | 0.13 | 0.18 | 0.38 |
| 17031430500 | Census Tract 4305 | GPU | 0.13 | 0.28 | 0.47 |
| 17031242700 | Census Tract 2427 | GPU | 0.13 | 0.23 | 0.55 |
| 17031241100 | Census Tract 2411 | GPU | 0.13 | 0.16 | 0.86 |
| 17031020702 | Census Tract 207.02 | GPU | 0.13 | 0.18 | 0.84 |
| 17031839700 | Census Tract 8397 | GPU | 0.13 | 0.28 | 0.57 |
| 17031190200 | Census Tract 1902 | GPU | 0.13 | 0.33 | 0.53 |
| 17031150800 | Census Tract 1508 | GPU | 0.13 | 0.22 | 0.79 |
| 17031050500 | Census Tract 505 | GPU | 0.13 | 0.35 | 0.48 |
| 17031420700 | Census Tract 4207 | GPU | 0.13 | 0.28 | 0.64 |
| 17031240600 | Census Tract 2406 | GPU | 0.13 | 0.19 | 0.82 |
| 17031816402 | Census Tract 8164.02 | GPU | 0.13 | 0.31 | 0.36 |
| 17031430800 | Census Tract 4308 | GPU | 0.13 | 0.28 | 0.34 |
| 17031171100 | Census Tract 1711 | GPU | 0.13 | 0.33 | 0.37 |
| 17031250600 | Census Tract 2506 | GPU | 0.13 | 0.21 | 0.35 |
| 17031460301 | Census Tract 4603.01 | GPU | 0.13 | 0.22 | 0.81 |
| 17031070600 | Census Tract 706 | GPU | 0.13 | 0.32 | 0.49 |
| 17031590600 | Census Tract 5906 | GPU | 0.13 | 0.29 | 0.41 |
| 17031660600 | Census Tract 6606 | GPU | 0.13 | 0.24 | 0.47 |
| 17031221100 | Census Tract 2211 | GPU | 0.12 | 0.35 | 0.37 |
| 17031242400 | Census Tract 2424 | GPU | 0.12 | 0.39 | 0.45 |
| 17031242300 | Census Tract 2423 | GPU | 0.12 | 0.38 | 0.78 |
| 17031839800 | Census Tract 8398 | GPU | 0.12 | 0.22 | 0.54 |
| 17031240700 | Census Tract 2407 | GPU | 0.12 | 0.31 | 0.66 |
| 17031811302 | Census Tract 8113.02 | GPU | 0.12 | 0.37 | 0.47 |
| 17031300800 | Census Tract 3008 | GPU | 0.12 | 0.22 | 0.81 |
| 17031710100 | Census Tract 7101 | GPU | 0.12 | 0.12 | 0.88 |
| 17031242500 | Census Tract 2425 | GPU | 0.12 | 0.29 | 0.58 |
| 17031050900 | Census Tract 509 | GPU | 0.12 | 0.19 | 0.87 |
| 17031151002 | Census Tract 1510.02 | GPU | 0.12 | 0.26 | 0.68 |
| 17031030500 | Census Tract 305 | GPU | 0.12 | 0.42 | 0.45 |
| 17031230900 | Census Tract 2309 | GPU | 0.12 | 0.24 | 0.56 |
| 17031430700 | Census Tract 4307 | GPU | 0.12 | 0.46 | 0.56 |
| 17031030200 | Census Tract 302 | GPU | 0.12 | 0.42 | 0.47 |
| 17031839100 | Census Tract 8391 | GPU | 0.12 | 0.38 | 0.49 |
| 17031230200 | Census Tract 2302 | GPU | 0.12 | 0.21 | 0.65 |
| 17031580501 | Census Tract 5805.01 | GPU | 0.12 | 0.22 | 0.86 |
| 17031600400 | Census Tract 6004 | GPU | 0.12 | 0.23 | 0.52 |
| 17031230100 | Census Tract 2301 | GPU | 0.12 | 0.22 | 0.61 |
| 17031151100 | Census Tract 1511 | GPU | 0.12 | 0.25 | 0.33 |
| 17031600900 | Census Tract 6009 | GPU | 0.12 | 0.30 | 0.43 |
| 17031050800 | Census Tract 508 | GPU | 0.12 | 0.28 | 0.33 |
| 17031040900 | Census Tract 409 | GPU | 0.12 | 0.36 | 0.40 |
| 17031151001 | Census Tract 1510.01 | GPU | 0.12 | 0.21 | 0.54 |
| 17031243100 | Census Tract 2431 | GPU | 0.12 | 0.25 | 0.70 |
| 17031600700 | Census Tract 6007 | GPU | 0.12 | 0.30 | 0.39 |
| 17031242900 | Census Tract 2429 | GPU | 0.12 | 0.35 | 0.44 |
| 17031600600 | Census Tract 6006 | GPU | 0.12 | 0.30 | 0.44 |
| 17031160601 | Census Tract 1606.01 | GPU | 0.11 | 0.23 | 0.83 |
| 17031240500 | Census Tract 2405 | GPU | 0.11 | 0.48 | 0.57 |
| 17031150401 | Census Tract 1504.01 | GPU | 0.11 | 0.26 | 0.47 |
| 17031063303 | Census Tract 633.03 | GPU | 0.11 | 0.42 | 0.52 |
| 17031241000 | Census Tract 2410 | GPU | 0.11 | 0.26 | 0.75 |
| 17031240200 | Census Tract 2402 | GPU | 0.11 | 0.21 | 0.39 |
| 17031220601 | Census Tract 2206.01 | GPU | 0.11 | 0.31 | 0.44 |
| 17031051300 | Census Tract 513 | GPU | 0.11 | 0.28 | 0.61 |
| 17031520400 | Census Tract 5204 | GPU | 0.11 | 0.22 | 0.59 |
| 17031210602 | Census Tract 2106.02 | GPU | 0.11 | 0.23 | 0.74 |
| 17031241500 | Census Tract 2415 | GPU | 0.11 | 0.27 | 0.61 |
| 17031242600 | Census Tract 2426 | GPU | 0.11 | 0.31 | 0.79 |
| 17031242000 | Census Tract 2420 | GPU | 0.11 | 0.23 | 0.60 |
| 17031836300 | Census Tract 8363 | GPU | 0.11 | 0.39 | 0.46 |
| 17031823703 | Census Tract 8237.03 | GPU | 0.11 | 0.36 | 0.37 |
| 17031062000 | Census Tract 620 | GPU | 0.11 | 0.32 | 0.39 |
| 17031242100 | Census Tract 2421 | GPU | 0.11 | 0.28 | 0.45 |
| 17031221600 | Census Tract 2216 | GPU | 0.11 | 0.30 | 0.37 |
| 17031160502 | Census Tract 1605.02 | GPU | 0.11 | 0.22 | 0.75 |
| 17031210502 | Census Tract 2105.02 | GPU | 0.10 | 0.29 | 0.47 |
| 17031820501 | Census Tract 8205.01 | GPU | 0.10 | 0.36 | 0.43 |
| 17031063100 | Census Tract 631 | GPU | 0.10 | 0.40 | 0.43 |
| 17031081600 | Census Tract 816 | GPU | 0.10 | 0.48 | 0.50 |
| 17031815800 | Census Tract 8158 | GPU | 0.10 | 0.43 | 0.55 |
| 17031220701 | Census Tract 2207.01 | GPU | 0.10 | 0.18 | 0.54 |
| 17031241300 | Census Tract 2413 | GPU | 0.10 | 0.60 | 0.67 |
| 17031062800 | Census Tract 628 | GPU | 0.10 | 0.33 | 0.41 |
| 17031210601 | Census Tract 2106.01 | GPU | 0.10 | 0.19 | 0.82 |
| 17031310800 | Census Tract 3108 | GPU | 0.10 | 0.26 | 0.57 |
| 17031817900 | Census Tract 8179 | GPU | 0.10 | 0.31 | 0.38 |
| 17031030103 | Census Tract 301.03 | GPU | 0.09 | 0.40 | 0.47 |
| 17031831000 | Census Tract 8310 | GPU | 0.09 | 0.31 | 0.43 |
| 17031051000 | Census Tract 510 | GPU | 0.09 | 0.20 | 0.91 |
| 17031030601 | Census Tract 306.01 | GPU | 0.09 | 0.48 | 0.65 |
| 17031030101 | Census Tract 301.01 | GPU | 0.09 | 0.45 | 0.64 |
| 17031240300 | Census Tract 2403 | GPU | 0.09 | 0.22 | 0.46 |
| 17031031501 | Census Tract 315.01 | GPU | 0.09 | 0.50 | 0.57 |
| 17031832400 | Census Tract 8324 | GPU | 0.09 | 0.26 | 0.78 |
| 17031829901 | Census Tract 8299.01 | GPU | 0.09 | 0.26 | 0.41 |
| 17031220901 | Census Tract 2209.01 | GPU | 0.08 | 0.22 | 0.36 |
| 17031802702 | Census Tract 8027.02 | GPU | 0.08 | 0.35 | 0.42 |
| 17031816300 | Census Tract 8163 | GPU | 0.07 | 0.20 | 0.68 |
| 17031806102 | Census Tract 8061.02 | GPU | 0.06 | 0.29 | 0.66 |
| 17031825400 | Census Tract 8254 | GPU | 0.06 | 0.18 | 0.45 |
| 17031802605 | Census Tract 8026.05 | GPU | 0.05 | 0.36 | 0.38 |
| 17031817200 | Census Tract 8172 | GPU | 0.02 | 0.21 | 0.36 |
| 17031823803 | Census Tract 8238.03 | GPU | 0.01 | 0.33 | 0.39 |
| 17031816600 | Census Tract 8166 | GPU | 0.00 | 0.12 | 0.73 |
| 17031818100 | Census Tract 8181 | GPU | 0.00 | 0.22 | 0.63 |
| 17031819500 | Census Tract 8195 | GPU | 0.00 | 0.35 | 0.36 |
| 17031824122 | Census Tract 8241.22 | GPU | 0.00 | 0.13 | 0.29 |
| 17031823805 | Census Tract 8238.05 | GPU | 0.00 | 0.38 | 0.50 |
| 17031817000 | Census Tract 8170 | GPU | 0.00 | 0.28 | 0.48 |
| 17031818200 | Census Tract 8182 | GPU | 0.00 | 0.15 | 0.78 |
| 17031824123 | Census Tract 8241.23 | GPU | 0.00 | 0.05 | 0.35 |
| 17031805112 | Census Tract 8051.12 | GPU | 0.00 | 0.35 | 0.37 |
| 17031806501 | Census Tract 8065.01 | GPU | 0.00 | 0.30 | 0.42 |
| 17031820603 | Census Tract 8206.03 | GPU | 0.00 | 0.37 | 0.44 |
| 17031804610 | Census Tract 8046.1 | GPU | 0.00 | 0.34 | 0.41 |
| 17031804902 | Census Tract 8049.02 | GPU | 0.00 | 0.32 | 0.36 |
| 17031805106 | Census Tract 8051.06 | GPU | 0.00 | 0.31 | 0.42 |
| 17031803701 | Census Tract 8037.01 | GPU | 0.00 | 0.35 | 0.37 |
| 17031817101 | Census Tract 8171.01 | GPU | 0.00 | 0.22 | 0.37 |
| 17031819300 | Census Tract 8193 | GPU | 0.00 | 0.25 | 0.59 |
| 17031816900 | Census Tract 8169 | GPU | 0.00 | 0.30 | 0.36 |
| 17031825304 | Census Tract 8253.04 | GPU | 0.00 | 0.25 | 0.30 |
| 17031811402 | Census Tract 8114.02 | GPU | 0.00 | 0.16 | 0.46 |
| 17031804806 | Census Tract 8048.06 | GPU | 0.00 | 0.22 | 0.46 |
| 17031802504 | Census Tract 8025.04 | GPU | 0.00 | 0.31 | 0.52 |
| 17031818900 | Census Tract 8189 | GPU | 0.00 | 0.30 | 0.50 |
| 17031816500 | Census Tract 8165 | GPU | 0.00 | 0.25 | 0.51 |
| 17031816700 | Census Tract 8167 | GPU | 0.00 | 0.25 | 0.47 |
| 17031817102 | Census Tract 8171.02 | GPU | 0.00 | 0.22 | 0.63 |
| 17031818000 | Census Tract 8180 | GPU | 0.00 | 0.24 | 0.49 |
| 17031803400 | Census Tract 8034 | GPU | 0.00 | 0.35 | 0.40 |
| 17031820604 | Census Tract 8206.04 | GPU | 0.00 | 0.26 | 0.35 |
| 17031825303 | Census Tract 8253.03 | GPU | 0.00 | 0.17 | 0.28 |
| 17031824121 | Census Tract 8241.21 | GPU | 0.00 | 0.23 | 0.32 |
| 17031980000 | Census Tract 9800 | GPU | 0.00 | 0.13 | 0.33 |
| 17031805105 | Census Tract 8051.05 | GPU | 0.00 | 0.33 | 0.38 |
| 17031802801 | Census Tract 8028.01 | GPU | 0.00 | 0.30 | 0.48 |
| 17031818800 | Census Tract 8188 | GPU | 0.00 | 0.28 | 0.33 |
| 17031819900 | Census Tract 8199 | GPU | 0.00 | 0.31 | 0.55 |
| 17031811702 | Census Tract 8117.02 | GPU | 0.00 | 0.27 | 0.32 |
| 17031816401 | Census Tract 8164.01 | GPU | 0.00 | 0.20 | 0.47 |
| 17031818600 | Census Tract 8186 | GPU | 0.00 | 0.29 | 0.38 |
| 17031818700 | Census Tract 8187 | GPU | 0.00 | 0.23 | 0.69 |
| 17031803015 | Census Tract 8030.15 | GPU | 0.00 | 0.36 | 0.38 |
| 17031803606 | Census Tract 8036.06 | GPU | 0.00 | 0.27 | 0.37 |
| 17031842500 | Census Tract 8425 | SWMM_HEC | 0.30 | 0.43 | 0.43 |
| 17031808100 | Census Tract 8081 | SWMM_HEC | 0.29 | 0.43 | 0.42 |
| 17031801608 | Census Tract 8016.08 | SWMM_HEC | 0.27 | 0.44 | 0.38 |
| 17031808200 | Census Tract 8082 | SWMM_HEC | 0.27 | 0.41 | 0.41 |
| 17031831400 | Census Tract 8314 | SWMM_HEC | 0.26 | 0.46 | 0.41 |
| 17031805401 | Census Tract 8054.01 | SWMM_HEC | 0.26 | 0.41 | 0.33 |
| 17031801500 | Census Tract 8015 | SWMM_HEC | 0.26 | 0.53 | 0.35 |
| 17031802003 | Census Tract 8020.03 | SWMM_HEC | 0.26 | 0.50 | 0.33 |
| 17031520100 | Census Tract 5201 | SWMM_HEC | 0.26 | 0.45 | 0.37 |
| 17031031400 | Census Tract 314 | SWMM_HEC | 0.25 | 0.48 | 0.36 |
| 17031801607 | Census Tract 8016.07 | SWMM_HEC | 0.25 | 0.50 | 0.33 |
| 17031801601 | Census Tract 8016.01 | SWMM_HEC | 0.25 | 0.47 | 0.35 |
| 17031836500 | Census Tract 8365 | SWMM_HEC | 0.25 | 0.44 | 0.40 |
| 17031806001 | Census Tract 8060.01 | SWMM_HEC | 0.25 | 0.44 | 0.33 |
| 17031340600 | Census Tract 3406 | SWMM_HEC | 0.25 | 0.36 | 0.31 |
| 17031805201 | Census Tract 8052.01 | SWMM_HEC | 0.25 | 0.47 | 0.30 |
| 17031806004 | Census Tract 8060.04 | SWMM_HEC | 0.25 | 0.44 | 0.32 |
| 17031320400 | Census Tract 3204 | SWMM_HEC | 0.25 | 0.45 | 0.31 |
| 17031843000 | Census Tract 8430 | SWMM_HEC | 0.24 | 0.40 | 0.31 |
| 17031802002 | Census Tract 8020.02 | SWMM_HEC | 0.24 | 0.50 | 0.33 |
| 17031801605 | Census Tract 8016.05 | SWMM_HEC | 0.24 | 0.41 | 0.32 |
| 17031330100 | Census Tract 3301 | SWMM_HEC | 0.24 | 0.50 | 0.35 |
| 17031828202 | Census Tract 8282.02 | SWMM_HEC | 0.24 | 0.38 | 0.34 |
| 17031550200 | Census Tract 5502 | SWMM_HEC | 0.24 | 0.37 | 0.40 |
| 17031806801 | Census Tract 8068.01 | SWMM_HEC | 0.24 | 0.43 | 0.33 |
| 17031252101 | Census Tract 2521.01 | SWMM_HEC | 0.24 | 0.47 | 0.41 |
| 17031802004 | Census Tract 8020.04 | SWMM_HEC | 0.24 | 0.55 | 0.31 |
| 17031801701 | Census Tract 8017.01 | SWMM_HEC | 0.24 | 0.49 | 0.29 |
| 17031806003 | Census Tract 8060.03 | SWMM_HEC | 0.24 | 0.38 | 0.36 |
| 17031802506 | Census Tract 8025.06 | SWMM_HEC | 0.24 | 0.50 | 0.50 |
| 17031801902 | Census Tract 8019.02 | SWMM_HEC | 0.23 | 0.44 | 0.39 |
| 17031823200 | Census Tract 8232 | SWMM_HEC | 0.23 | 0.46 | 0.40 |
| 17031801606 | Census Tract 8016.06 | SWMM_HEC | 0.23 | 0.48 | 0.33 |
| 17031805202 | Census Tract 8052.02 | SWMM_HEC | 0.23 | 0.38 | 0.30 |
| 17031801800 | Census Tract 8018 | SWMM_HEC | 0.23 | 0.47 | 0.34 |
| 17031500100 | Census Tract 5001 | SWMM_HEC | 0.23 | 0.42 | 0.33 |
| 17031690300 | Census Tract 6903 | SWMM_HEC | 0.23 | 0.42 | 0.37 |
| 17031301801 | Census Tract 3018.01 | SWMM_HEC | 0.23 | 0.37 | 0.26 |
| 17031805701 | Census Tract 8057.01 | SWMM_HEC | 0.23 | 0.46 | 0.35 |
| 17031800400 | Census Tract 8004 | SWMM_HEC | 0.23 | 0.58 | 0.30 |
| 17031808600 | Census Tract 8086 | SWMM_HEC | 0.23 | 0.50 | 0.41 |
| 17031800600 | Census Tract 8006 | SWMM_HEC | 0.23 | 0.54 | 0.35 |
| 17031834600 | Census Tract 8346 | SWMM_HEC | 0.23 | 0.45 | 0.42 |
| 17031843200 | Census Tract 8432 | SWMM_HEC | 0.23 | 0.41 | 0.31 |
| 17031460100 | Census Tract 4601 | SWMM_HEC | 0.23 | 0.36 | 0.35 |
| 17031800100 | Census Tract 8001 | SWMM_HEC | 0.23 | 0.52 | 0.25 |
| 17031823302 | Census Tract 8233.02 | SWMM_HEC | 0.23 | 0.45 | 0.42 |
| 17031808400 | Census Tract 8084 | SWMM_HEC | 0.23 | 0.41 | 0.37 |
| 17031071500 | Census Tract 715 | SWMM_HEC | 0.23 | 0.47 | 0.29 |
| 17031060500 | Census Tract 605 | SWMM_HEC | 0.23 | 0.43 | 0.24 |
| 17031822702 | Census Tract 8227.02 | SWMM_HEC | 0.23 | 0.40 | 0.29 |
| 17031806802 | Census Tract 8068.02 | SWMM_HEC | 0.22 | 0.38 | 0.31 |
| 17031411000 | Census Tract 4110 | SWMM_HEC | 0.22 | 0.50 | 0.43 |
| 17031825501 | Census Tract 8255.01 | SWMM_HEC | 0.22 | 0.44 | 0.34 |
| 17031801603 | Census Tract 8016.03 | SWMM_HEC | 0.22 | 0.49 | 0.39 |
| 17031834500 | Census Tract 8345 | SWMM_HEC | 0.22 | 0.39 | 0.31 |
| 17031825600 | Census Tract 8256 | SWMM_HEC | 0.22 | 0.45 | 0.36 |
| 17031351100 | Census Tract 3511 | SWMM_HEC | 0.22 | 0.31 | 0.24 |
| 17031805302 | Census Tract 8053.02 | SWMM_HEC | 0.22 | 0.35 | 0.30 |
| 17031800300 | Census Tract 8003 | SWMM_HEC | 0.22 | 0.47 | 0.35 |
| 17031500200 | Census Tract 5002 | SWMM_HEC | 0.22 | 0.41 | 0.42 |
| 17031828201 | Census Tract 8282.01 | SWMM_HEC | 0.22 | 0.51 | 0.31 |
| 17031843500 | Census Tract 8435 | SWMM_HEC | 0.22 | 0.41 | 0.38 |
| 17031828300 | Census Tract 8283 | SWMM_HEC | 0.22 | 0.47 | 0.35 |
| 17031351000 | Census Tract 3510 | SWMM_HEC | 0.22 | 0.46 | 0.32 |
| 17031807000 | Census Tract 8070 | SWMM_HEC | 0.22 | 0.45 | 0.37 |
| 17031823602 | Census Tract 8236.02 | SWMM_HEC | 0.22 | 0.43 | 0.40 |
| 17031828402 | Census Tract 8284.02 | SWMM_HEC | 0.22 | 0.46 | 0.41 |
| 17031800500 | Census Tract 8005 | SWMM_HEC | 0.22 | 0.50 | 0.39 |
| 17031806700 | Census Tract 8067 | SWMM_HEC | 0.22 | 0.42 | 0.34 |
| 17031802200 | Census Tract 8022 | SWMM_HEC | 0.22 | 0.46 | 0.38 |
| 17031827805 | Census Tract 8278.05 | SWMM_HEC | 0.22 | 0.42 | 0.34 |
| 17031805501 | Census Tract 8055.01 | SWMM_HEC | 0.22 | 0.44 | 0.30 |
| 17031817500 | Census Tract 8175 | SWMM_HEC | 0.22 | 0.44 | 0.41 |
| 17031825503 | Census Tract 8255.03 | SWMM_HEC | 0.22 | 0.49 | 0.35 |
| 17031806104 | Census Tract 8061.04 | SWMM_HEC | 0.22 | 0.48 | 0.46 |
| 17031841900 | Census Tract 8419 | SWMM_HEC | 0.22 | 0.46 | 0.35 |
| 17031802100 | Census Tract 8021 | SWMM_HEC | 0.22 | 0.44 | 0.33 |
| 17031130200 | Census Tract 1302 | SWMM_HEC | 0.22 | 0.45 | 0.38 |
| 17031800200 | Census Tract 8002 | SWMM_HEC | 0.21 | 0.50 | 0.31 |
| 17031261000 | Census Tract 2610 | SWMM_HEC | 0.21 | 0.50 | 0.35 |
| 17031825200 | Census Tract 8252 | SWMM_HEC | 0.21 | 0.45 | 0.34 |
| 17031823002 | Census Tract 8230.02 | SWMM_HEC | 0.21 | 0.41 | 0.39 |
| 17031839200 | Census Tract 8392 | SWMM_HEC | 0.21 | 0.39 | 0.31 |
| 17031826500 | Census Tract 8265 | SWMM_HEC | 0.21 | 0.42 | 0.41 |
| 17031821600 | Census Tract 8216 | SWMM_HEC | 0.21 | 0.43 | 0.39 |
| 17031381900 | Census Tract 3819 | SWMM_HEC | 0.21 | 0.39 | 0.36 |
| 17031805902 | Census Tract 8059.02 | SWMM_HEC | 0.21 | 0.37 | 0.33 |
| 17031801000 | Census Tract 8010 | SWMM_HEC | 0.21 | 0.45 | 0.39 |
| 17031823102 | Census Tract 8231.02 | SWMM_HEC | 0.21 | 0.43 | 0.37 |
| 17031805301 | Census Tract 8053.01 | SWMM_HEC | 0.21 | 0.36 | 0.23 |
| 17031063200 | Census Tract 632 | SWMM_HEC | 0.21 | 0.55 | 0.32 |
| 17031808302 | Census Tract 8083.02 | SWMM_HEC | 0.21 | 0.42 | 0.29 |
| 17031824602 | Census Tract 8246.02 | SWMM_HEC | 0.21 | 0.45 | 0.38 |
| 17031807300 | Census Tract 8073 | SWMM_HEC | 0.21 | 0.46 | 0.31 |
| 17031380500 | Census Tract 3805 | SWMM_HEC | 0.21 | 0.46 | 0.35 |
| 17031828401 | Census Tract 8284.01 | SWMM_HEC | 0.21 | 0.49 | 0.38 |
| 17031819100 | Census Tract 8191 | SWMM_HEC | 0.21 | 0.48 | 0.31 |
| 17031823605 | Census Tract 8236.05 | SWMM_HEC | 0.20 | 0.40 | 0.39 |
| 17031809000 | Census Tract 8090 | SWMM_HEC | 0.20 | 0.46 | 0.31 |
| 17031826201 | Census Tract 8262.01 | SWMM_HEC | 0.20 | 0.49 | 0.41 |
| 17031830600 | Census Tract 8306 | SWMM_HEC | 0.20 | 0.37 | 0.32 |
| 17031700502 | Census Tract 7005.02 | SWMM_HEC | 0.20 | 0.46 | 0.33 |
| 17031825505 | Census Tract 8255.05 | SWMM_HEC | 0.20 | 0.53 | 0.29 |
| 17031828702 | Census Tract 8287.02 | SWMM_HEC | 0.20 | 0.43 | 0.38 |
| 17031420300 | Census Tract 4203 | SWMM_HEC | 0.20 | 0.48 | 0.38 |
| 17031827700 | Census Tract 8277 | SWMM_HEC | 0.20 | 0.48 | 0.45 |
| 17031810400 | Census Tract 8104 | SWMM_HEC | 0.20 | 0.42 | 0.27 |
| 17031830700 | Census Tract 8307 | SWMM_HEC | 0.20 | 0.45 | 0.39 |
| 17031350400 | Census Tract 3504 | SWMM_HEC | 0.20 | 0.47 | 0.32 |
| 17031720500 | Census Tract 7205 | SWMM_HEC | 0.20 | 0.53 | 0.27 |
| 17031822500 | Census Tract 8225 | SWMM_HEC | 0.20 | 0.43 | 0.36 |
| 17031837800 | Census Tract 8378 | SWMM_HEC | 0.20 | 0.38 | 0.33 |
| 17031190601 | Census Tract 1906.01 | SWMM_HEC | 0.20 | 0.41 | 0.24 |
| 17031270500 | Census Tract 2705 | SWMM_HEC | 0.20 | 0.52 | 0.42 |
| 17031815600 | Census Tract 8156 | SWMM_HEC | 0.20 | 0.41 | 0.38 |
| 17031120200 | Census Tract 1202 | SWMM_HEC | 0.20 | 0.46 | 0.36 |
| 17031420100 | Census Tract 4201 | SWMM_HEC | 0.20 | 0.43 | 0.35 |
| 17031260900 | Census Tract 2609 | SWMM_HEC | 0.20 | 0.56 | 0.26 |
| 17031816000 | Census Tract 8160 | SWMM_HEC | 0.20 | 0.52 | 0.35 |
| 17031805802 | Census Tract 8058.02 | SWMM_HEC | 0.20 | 0.36 | 0.31 |
| 17031817600 | Census Tract 8176 | SWMM_HEC | 0.20 | 0.53 | 0.27 |
| 17031260600 | Census Tract 2606 | SWMM_HEC | 0.20 | 0.47 | 0.42 |
| 17031520200 | Census Tract 5202 | SWMM_HEC | 0.20 | 0.37 | 0.37 |
| 17031805402 | Census Tract 8054.02 | SWMM_HEC | 0.20 | 0.37 | 0.28 |
| 17031770700 | Census Tract 7707 | SWMM_HEC | 0.20 | 0.39 | 0.40 |
| 17031825504 | Census Tract 8255.04 | SWMM_HEC | 0.20 | 0.51 | 0.29 |
| 17031825000 | Census Tract 8250 | SWMM_HEC | 0.20 | 0.51 | 0.34 |
| 17031806502 | Census Tract 8065.02 | SWMM_HEC | 0.20 | 0.44 | 0.35 |
| 17031825803 | Census Tract 8258.03 | SWMM_HEC | 0.20 | 0.35 | 0.34 |
| 17031400400 | Census Tract 4004 | SWMM_HEC | 0.20 | 0.34 | 0.21 |
| 17031823101 | Census Tract 8231.01 | SWMM_HEC | 0.20 | 0.51 | 0.30 |
| 17031120100 | Census Tract 1201 | SWMM_HEC | 0.20 | 0.52 | 0.36 |
| 17031821200 | Census Tract 8212 | SWMM_HEC | 0.19 | 0.51 | 0.31 |
| 17031822200 | Census Tract 8222 | SWMM_HEC | 0.19 | 0.38 | 0.36 |
| 17031828601 | Census Tract 8286.01 | SWMM_HEC | 0.19 | 0.45 | 0.31 |
| 17031805502 | Census Tract 8055.02 | SWMM_HEC | 0.19 | 0.43 | 0.29 |
| 17031090300 | Census Tract 903 | SWMM_HEC | 0.19 | 0.40 | 0.37 |
| 17031833000 | Census Tract 8330 | SWMM_HEC | 0.19 | 0.45 | 0.35 |
| 17031823400 | Census Tract 8234 | SWMM_HEC | 0.19 | 0.47 | 0.38 |
| 17031801300 | Census Tract 8013 | SWMM_HEC | 0.19 | 0.55 | 0.31 |
| 17031491300 | Census Tract 4913 | SWMM_HEC | 0.19 | 0.49 | 0.30 |
| 17031828602 | Census Tract 8286.02 | SWMM_HEC | 0.19 | 0.43 | 0.35 |
| 17031824601 | Census Tract 8246.01 | SWMM_HEC | 0.19 | 0.51 | 0.30 |
| 17031808900 | Census Tract 8089 | SWMM_HEC | 0.19 | 0.45 | 0.35 |
| 17031381200 | Census Tract 3812 | SWMM_HEC | 0.19 | 0.53 | 0.22 |
| 17031826100 | Census Tract 8261 | SWMM_HEC | 0.19 | 0.47 | 0.32 |
| 17031809100 | Census Tract 8091 | SWMM_HEC | 0.19 | 0.56 | 0.40 |
| 17031822802 | Census Tract 8228.02 | SWMM_HEC | 0.19 | 0.40 | 0.29 |
| 17031540101 | Census Tract 5401.01 | SWMM_HEC | 0.19 | 0.41 | 0.38 |
| 17031826600 | Census Tract 8266 | SWMM_HEC | 0.19 | 0.40 | 0.39 |
| 17031836100 | Census Tract 8361 | SWMM_HEC | 0.19 | 0.39 | 0.36 |
| 17031040100 | Census Tract 401 | SWMM_HEC | 0.19 | 0.52 | 0.28 |
| 17031805600 | Census Tract 8056 | SWMM_HEC | 0.19 | 0.50 | 0.24 |
| 17031720200 | Census Tract 7202 | SWMM_HEC | 0.19 | 0.52 | 0.39 |
| 17031802402 | Census Tract 8024.02 | SWMM_HEC | 0.19 | 0.45 | 0.39 |
| 17031672000 | Census Tract 6720 | SWMM_HEC | 0.19 | 0.33 | 0.29 |
| 17031829800 | Census Tract 8298 | SWMM_HEC | 0.19 | 0.51 | 0.33 |
| 17031809800 | Census Tract 8098 | SWMM_HEC | 0.19 | 0.51 | 0.37 |
| 17031801200 | Census Tract 8012 | SWMM_HEC | 0.19 | 0.58 | 0.29 |
| 17031330200 | Census Tract 3302 | SWMM_HEC | 0.19 | 0.47 | 0.43 |
| 17031090100 | Census Tract 901 | SWMM_HEC | 0.19 | 0.34 | 0.29 |
| 17031010202 | Census Tract 102.02 | SWMM_HEC | 0.19 | 0.41 | 0.22 |
| 17031841000 | Census Tract 8410 | SWMM_HEC | 0.19 | 0.46 | 0.31 |
| 17031831500 | Census Tract 8315 | SWMM_HEC | 0.19 | 0.34 | 0.28 |
| 17031821900 | Census Tract 8219 | SWMM_HEC | 0.19 | 0.36 | 0.34 |
| 17031750100 | Census Tract 7501 | SWMM_HEC | 0.19 | 0.41 | 0.26 |
| 17031680900 | Census Tract 6809 | SWMM_HEC | 0.19 | 0.39 | 0.30 |
| 17031808800 | Census Tract 8088 | SWMM_HEC | 0.19 | 0.54 | 0.28 |
| 17031100300 | Census Tract 1003 | SWMM_HEC | 0.18 | 0.50 | 0.30 |
| 17031815701 | Census Tract 8157.01 | SWMM_HEC | 0.18 | 0.45 | 0.38 |
| 17031828801 | Census Tract 8288.01 | SWMM_HEC | 0.18 | 0.52 | 0.27 |
| 17031810501 | Census Tract 8105.01 | SWMM_HEC | 0.18 | 0.33 | 0.33 |
| 17031843900 | Census Tract 8439 | SWMM_HEC | 0.18 | 0.51 | 0.38 |
| 17031081402 | Census Tract 814.02 | SWMM_HEC | 0.18 | 0.68 | 0.23 |
| 17031826304 | Census Tract 8263.04 | SWMM_HEC | 0.18 | 0.44 | 0.32 |
| 17031835900 | Census Tract 8359 | SWMM_HEC | 0.18 | 0.36 | 0.33 |
| 17031250400 | Census Tract 2504 | SWMM_HEC | 0.18 | 0.38 | 0.29 |
| 17031826401 | Census Tract 8264.01 | SWMM_HEC | 0.18 | 0.42 | 0.37 |
| 17031821500 | Census Tract 8215 | SWMM_HEC | 0.18 | 0.40 | 0.39 |
| 17031490500 | Census Tract 4905 | SWMM_HEC | 0.18 | 0.36 | 0.30 |
| 17031838800 | Census Tract 8388 | SWMM_HEC | 0.18 | 0.35 | 0.31 |
| 17031822101 | Census Tract 8221.01 | SWMM_HEC | 0.18 | 0.40 | 0.36 |
| 17031820300 | Census Tract 8203 | SWMM_HEC | 0.18 | 0.43 | 0.37 |
| 17031711300 | Census Tract 7113 | SWMM_HEC | 0.18 | 0.46 | 0.25 |
| 17031250300 | Census Tract 2503 | SWMM_HEC | 0.18 | 0.37 | 0.36 |
| 17031280400 | Census Tract 2804 | SWMM_HEC | 0.18 | 0.41 | 0.22 |
| 17031020100 | Census Tract 201 | SWMM_HEC | 0.18 | 0.43 | 0.24 |
| 17031720700 | Census Tract 7207 | SWMM_HEC | 0.18 | 0.54 | 0.41 |
| 17031730400 | Census Tract 7304 | SWMM_HEC | 0.18 | 0.49 | 0.25 |
| 17031815702 | Census Tract 8157.02 | SWMM_HEC | 0.18 | 0.48 | 0.37 |
| 17031530300 | Census Tract 5303 | SWMM_HEC | 0.18 | 0.38 | 0.32 |
| 17031071200 | Census Tract 712 | SWMM_HEC | 0.18 | 0.48 | 0.25 |
| 17031770901 | Census Tract 7709.01 | SWMM_HEC | 0.18 | 0.31 | 0.28 |
| 17031410900 | Census Tract 4109 | SWMM_HEC | 0.18 | 0.61 | 0.34 |
| 17031810502 | Census Tract 8105.02 | SWMM_HEC | 0.18 | 0.35 | 0.25 |
| 17031840200 | Census Tract 8402 | SWMM_HEC | 0.18 | 0.32 | 0.32 |
| 17031808702 | Census Tract 8087.02 | SWMM_HEC | 0.18 | 0.58 | 0.39 |
| 17031431400 | Census Tract 4314 | SWMM_HEC | 0.18 | 0.53 | 0.25 |
| 17031530400 | Census Tract 5304 | SWMM_HEC | 0.18 | 0.35 | 0.33 |
| 17031827000 | Census Tract 8270 | SWMM_HEC | 0.18 | 0.37 | 0.33 |
| 17031561100 | Census Tract 5611 | SWMM_HEC | 0.18 | 0.32 | 0.29 |
| 17031836000 | Census Tract 8360 | SWMM_HEC | 0.18 | 0.36 | 0.27 |
| 17031831600 | Census Tract 8316 | SWMM_HEC | 0.18 | 0.36 | 0.28 |
| 17031681200 | Census Tract 6812 | SWMM_HEC | 0.18 | 0.41 | 0.25 |
| 17031750500 | Census Tract 7505 | SWMM_HEC | 0.18 | 0.54 | 0.37 |
| 17031812400 | Census Tract 8124 | SWMM_HEC | 0.18 | 0.50 | 0.35 |
| 17031730700 | Census Tract 7307 | SWMM_HEC | 0.18 | 0.43 | 0.28 |
| 17031809400 | Census Tract 8094 | SWMM_HEC | 0.18 | 0.51 | 0.28 |
| 17031020902 | Census Tract 209.02 | SWMM_HEC | 0.18 | 0.51 | 0.20 |
| 17031817400 | Census Tract 8174 | SWMM_HEC | 0.18 | 0.44 | 0.32 |
| 17031810302 | Census Tract 8103.02 | SWMM_HEC | 0.18 | 0.43 | 0.35 |
| 17031720100 | Census Tract 7201 | SWMM_HEC | 0.17 | 0.56 | 0.23 |
| 17031814600 | Census Tract 8146 | SWMM_HEC | 0.17 | 0.29 | 0.29 |
| 17031833100 | Census Tract 8331 | SWMM_HEC | 0.17 | 0.56 | 0.23 |
| 17031815400 | Census Tract 8154 | SWMM_HEC | 0.17 | 0.44 | 0.42 |
| 17031250500 | Census Tract 2505 | SWMM_HEC | 0.17 | 0.48 | 0.23 |
| 17031809300 | Census Tract 8093 | SWMM_HEC | 0.17 | 0.57 | 0.24 |
| 17031828100 | Census Tract 8281 | SWMM_HEC | 0.17 | 0.46 | 0.22 |
| 17031100200 | Census Tract 1002 | SWMM_HEC | 0.17 | 0.39 | 0.36 |
| 17031750600 | Census Tract 7506 | SWMM_HEC | 0.17 | 0.41 | 0.28 |
| 17031839000 | Census Tract 8390 | SWMM_HEC | 0.17 | 0.49 | 0.38 |
| 17031061100 | Census Tract 611 | SWMM_HEC | 0.17 | 0.43 | 0.18 |
| 17031100400 | Census Tract 1004 | SWMM_HEC | 0.17 | 0.40 | 0.26 |
| 17031801100 | Census Tract 8011 | SWMM_HEC | 0.17 | 0.46 | 0.32 |
| 17031836400 | Census Tract 8364 | SWMM_HEC | 0.17 | 0.50 | 0.34 |
| 17031812802 | Census Tract 8128.02 | SWMM_HEC | 0.17 | 0.46 | 0.26 |
| 17031390100 | Census Tract 3901 | SWMM_HEC | 0.17 | 0.54 | 0.34 |
| 17031400500 | Census Tract 4005 | SWMM_HEC | 0.17 | 0.43 | 0.23 |
| 17031831800 | Census Tract 8318 | SWMM_HEC | 0.17 | 0.38 | 0.38 |
| 17031570400 | Census Tract 5704 | SWMM_HEC | 0.17 | 0.42 | 0.34 |
| 17031140100 | Census Tract 1401 | SWMM_HEC | 0.17 | 0.45 | 0.39 |
| 17031390600 | Census Tract 3906 | SWMM_HEC | 0.17 | 0.51 | 0.43 |
| 17031824505 | Census Tract 8245.05 | SWMM_HEC | 0.17 | 0.51 | 0.22 |
| 17031750200 | Census Tract 7502 | SWMM_HEC | 0.17 | 0.63 | 0.33 |
| 17031671800 | Census Tract 6718 | SWMM_HEC | 0.17 | 0.41 | 0.32 |
| 17031812000 | Census Tract 8120 | SWMM_HEC | 0.17 | 0.48 | 0.37 |
| 17031340300 | Census Tract 3403 | SWMM_HEC | 0.17 | 0.39 | 0.40 |
| 17031380200 | Census Tract 3802 | SWMM_HEC | 0.17 | 0.41 | 0.19 |
| 17031170300 | Census Tract 1703 | SWMM_HEC | 0.17 | 0.36 | 0.31 |
| 17031813000 | Census Tract 8130 | SWMM_HEC | 0.17 | 0.44 | 0.41 |
| 17031020500 | Census Tract 205 | SWMM_HEC | 0.17 | 0.52 | 0.34 |
| 17031530600 | Census Tract 5306 | SWMM_HEC | 0.17 | 0.42 | 0.36 |
| 17031081000 | Census Tract 810 | SWMM_HEC | 0.17 | 0.47 | 0.30 |
| 17031842000 | Census Tract 8420 | SWMM_HEC | 0.17 | 0.49 | 0.41 |
| 17031530200 | Census Tract 5302 | SWMM_HEC | 0.17 | 0.45 | 0.26 |
| 17031812900 | Census Tract 8129 | SWMM_HEC | 0.17 | 0.50 | 0.35 |
| 17031810702 | Census Tract 8107.02 | SWMM_HEC | 0.17 | 0.33 | 0.21 |
| 17031661100 | Census Tract 6611 | SWMM_HEC | 0.17 | 0.33 | 0.30 |
| 17031020200 | Census Tract 202 | SWMM_HEC | 0.17 | 0.37 | 0.36 |
| 17031061902 | Census Tract 619.02 | SWMM_HEC | 0.17 | 0.59 | 0.20 |
| 17031100500 | Census Tract 1005 | SWMM_HEC | 0.17 | 0.39 | 0.24 |
| 17031830005 | Census Tract 8300.05 | SWMM_HEC | 0.17 | 0.47 | 0.29 |
| 17031400800 | Census Tract 4008 | SWMM_HEC | 0.17 | 0.41 | 0.30 |
| 17031081800 | Census Tract 818 | SWMM_HEC | 0.17 | 0.40 | 0.23 |
| 17031809500 | Census Tract 8095 | SWMM_HEC | 0.17 | 0.56 | 0.29 |
| 17031080202 | Census Tract 802.02 | SWMM_HEC | 0.17 | 0.55 | 0.20 |
| 17031829902 | Census Tract 8299.02 | SWMM_HEC | 0.17 | 0.43 | 0.33 |
| 17031071400 | Census Tract 714 | SWMM_HEC | 0.17 | 0.51 | 0.23 |
| 17031160100 | Census Tract 1601 | SWMM_HEC | 0.17 | 0.42 | 0.25 |
| 17031301802 | Census Tract 3018.02 | SWMM_HEC | 0.16 | 0.36 | 0.28 |
| 17031390400 | Census Tract 3904 | SWMM_HEC | 0.16 | 0.42 | 0.42 |
| 17031461000 | Census Tract 4610 | SWMM_HEC | 0.16 | 0.37 | 0.31 |
| 17031832900 | Census Tract 8329 | SWMM_HEC | 0.16 | 0.50 | 0.44 |
| 17031826402 | Census Tract 8264.02 | SWMM_HEC | 0.16 | 0.45 | 0.27 |
| 17031390500 | Census Tract 3905 | SWMM_HEC | 0.16 | 0.50 | 0.26 |
| 17031080100 | Census Tract 801 | SWMM_HEC | 0.16 | 0.73 | 0.18 |
| 17031283800 | Census Tract 2838 | SWMM_HEC | 0.16 | 0.39 | 0.28 |
| 17031828802 | Census Tract 8288.02 | SWMM_HEC | 0.16 | 0.45 | 0.26 |
| 17031730300 | Census Tract 7303 | SWMM_HEC | 0.16 | 0.44 | 0.26 |
| 17031806400 | Census Tract 8064 | SWMM_HEC | 0.16 | 0.44 | 0.29 |
| 17031170900 | Census Tract 1709 | SWMM_HEC | 0.16 | 0.37 | 0.18 |
| 17031836900 | Census Tract 8369 | SWMM_HEC | 0.16 | 0.49 | 0.41 |
| 17031030104 | Census Tract 301.04 | SWMM_HEC | 0.16 | 0.61 | 0.48 |
| 17031812100 | Census Tract 8121 | SWMM_HEC | 0.16 | 0.32 | 0.30 |
| 17031813100 | Census Tract 8131 | SWMM_HEC | 0.16 | 0.48 | 0.36 |
| 17031242800 | Census Tract 2428 | SWMM_HEC | 0.16 | 0.35 | 0.24 |
| 17031560900 | Census Tract 5609 | SWMM_HEC | 0.16 | 0.39 | 0.33 |
| 17031720300 | Census Tract 7203 | SWMM_HEC | 0.16 | 0.56 | 0.18 |
| 17031670600 | Census Tract 6706 | SWMM_HEC | 0.16 | 0.48 | 0.28 |
| 17031040300 | Census Tract 403 | SWMM_HEC | 0.16 | 0.46 | 0.34 |
| 17031010400 | Census Tract 104 | SWMM_HEC | 0.16 | 0.54 | 0.30 |
| 17031825302 | Census Tract 8253.02 | SWMM_HEC | 0.16 | 0.48 | 0.29 |
| 17031835800 | Census Tract 8358 | SWMM_HEC | 0.16 | 0.32 | 0.25 |
| 17031040202 | Census Tract 402.02 | SWMM_HEC | 0.16 | 0.59 | 0.18 |
| 17031081401 | Census Tract 814.01 | SWMM_HEC | 0.16 | 0.55 | 0.39 |
| 17031360200 | Census Tract 3602 | SWMM_HEC | 0.16 | 0.34 | 0.24 |
| 17031283200 | Census Tract 2832 | SWMM_HEC | 0.16 | 0.44 | 0.34 |
| 17031530501 | Census Tract 5305.01 | SWMM_HEC | 0.16 | 0.48 | 0.38 |
| 17031100700 | Census Tract 1007 | SWMM_HEC | 0.16 | 0.32 | 0.26 |
| 17031160200 | Census Tract 1602 | SWMM_HEC | 0.16 | 0.44 | 0.27 |
| 17031190401 | Census Tract 1904.01 | SWMM_HEC | 0.16 | 0.33 | 0.30 |
| 17031100100 | Census Tract 1001 | SWMM_HEC | 0.16 | 0.33 | 0.22 |
| 17031060900 | Census Tract 609 | SWMM_HEC | 0.16 | 0.51 | 0.44 |
| 17031810100 | Census Tract 8101 | SWMM_HEC | 0.16 | 0.44 | 0.34 |
| 17031809900 | Census Tract 8099 | SWMM_HEC | 0.16 | 0.53 | 0.20 |
| 17031090200 | Census Tract 902 | SWMM_HEC | 0.16 | 0.42 | 0.21 |
| 17031837300 | Census Tract 8373 | SWMM_HEC | 0.16 | 0.40 | 0.36 |
| 17031031100 | Census Tract 311 | SWMM_HEC | 0.16 | 0.46 | 0.40 |
| 17031020400 | Census Tract 204 | SWMM_HEC | 0.16 | 0.59 | 0.17 |
| 17031730201 | Census Tract 7302.01 | SWMM_HEC | 0.15 | 0.34 | 0.33 |
| 17031170400 | Census Tract 1704 | SWMM_HEC | 0.15 | 0.33 | 0.26 |
| 17031730600 | Census Tract 7306 | SWMM_HEC | 0.15 | 0.51 | 0.21 |
| 17031836200 | Census Tract 8362 | SWMM_HEC | 0.15 | 0.54 | 0.33 |
| 17031671100 | Census Tract 6711 | SWMM_HEC | 0.15 | 0.38 | 0.29 |
| 17031650301 | Census Tract 6503.01 | SWMM_HEC | 0.15 | 0.24 | 0.21 |
| 17031280100 | Census Tract 2801 | SWMM_HEC | 0.15 | 0.49 | 0.30 |
| 17031810000 | Census Tract 8100 | SWMM_HEC | 0.15 | 0.47 | 0.24 |
| 17031490902 | Census Tract 4909.02 | SWMM_HEC | 0.15 | 0.33 | 0.29 |
| 17031812700 | Census Tract 8127 | SWMM_HEC | 0.15 | 0.47 | 0.30 |
| 17031812301 | Census Tract 8123.01 | SWMM_HEC | 0.15 | 0.49 | 0.26 |
| 17031110400 | Census Tract 1104 | SWMM_HEC | 0.15 | 0.31 | 0.28 |
| 17031381800 | Census Tract 3818 | SWMM_HEC | 0.15 | 0.47 | 0.35 |
| 17031161100 | Census Tract 1611 | SWMM_HEC | 0.15 | 0.46 | 0.44 |
| 17031710500 | Census Tract 7105 | SWMM_HEC | 0.15 | 0.29 | 0.29 |
| 17031720400 | Census Tract 7204 | SWMM_HEC | 0.15 | 0.37 | 0.22 |
| 17031140301 | Census Tract 1403.01 | SWMM_HEC | 0.15 | 0.30 | 0.21 |
| 17031821300 | Census Tract 8213 | SWMM_HEC | 0.15 | 0.34 | 0.29 |
| 17031430200 | Census Tract 4302 | SWMM_HEC | 0.15 | 0.46 | 0.29 |
| 17031491200 | Census Tract 4912 | SWMM_HEC | 0.15 | 0.44 | 0.22 |
| 17031020302 | Census Tract 203.02 | SWMM_HEC | 0.15 | 0.40 | 0.40 |
| 17031100600 | Census Tract 1006 | SWMM_HEC | 0.15 | 0.44 | 0.29 |
| 17031410600 | Census Tract 4106 | SWMM_HEC | 0.15 | 0.42 | 0.33 |
| 17031810701 | Census Tract 8107.01 | SWMM_HEC | 0.15 | 0.37 | 0.19 |
| 17031060800 | Census Tract 608 | SWMM_HEC | 0.15 | 0.45 | 0.43 |
| 17031823500 | Census Tract 8235 | SWMM_HEC | 0.15 | 0.50 | 0.29 |
| 17031826700 | Census Tract 8267 | SWMM_HEC | 0.15 | 0.40 | 0.26 |
| 17031813200 | Census Tract 8132 | SWMM_HEC | 0.15 | 0.51 | 0.40 |
| 17031140400 | Census Tract 1404 | SWMM_HEC | 0.15 | 0.34 | 0.23 |
| 17031251500 | Census Tract 2515 | SWMM_HEC | 0.15 | 0.39 | 0.33 |
| 17031530503 | Census Tract 5305.03 | SWMM_HEC | 0.15 | 0.41 | 0.19 |
| 17031812801 | Census Tract 8128.01 | SWMM_HEC | 0.15 | 0.45 | 0.20 |
| 17031251200 | Census Tract 2512 | SWMM_HEC | 0.15 | 0.39 | 0.28 |
| 17031390700 | Census Tract 3907 | SWMM_HEC | 0.15 | 0.46 | 0.42 |
| 17031063301 | Census Tract 633.01 | SWMM_HEC | 0.14 | 0.44 | 0.43 |
| 17031320100 | Census Tract 3201 | SWMM_HEC | 0.14 | 0.53 | 0.22 |
| 17031071700 | Census Tract 717 | SWMM_HEC | 0.14 | 0.40 | 0.39 |
| 17031810200 | Census Tract 8102 | SWMM_HEC | 0.14 | 0.50 | 0.34 |
| 17031815900 | Census Tract 8159 | SWMM_HEC | 0.14 | 0.36 | 0.24 |
| 17031390200 | Census Tract 3902 | SWMM_HEC | 0.14 | 0.44 | 0.37 |
| 17031260800 | Census Tract 2608 | SWMM_HEC | 0.14 | 0.40 | 0.36 |
| 17031832100 | Census Tract 8321 | SWMM_HEC | 0.14 | 0.43 | 0.42 |
| 17031561000 | Census Tract 5610 | SWMM_HEC | 0.14 | 0.34 | 0.32 |
| 17031750300 | Census Tract 7503 | SWMM_HEC | 0.14 | 0.35 | 0.33 |
| 17031431302 | Census Tract 4313.02 | SWMM_HEC | 0.14 | 0.36 | 0.31 |
| 17031140302 | Census Tract 1403.02 | SWMM_HEC | 0.14 | 0.42 | 0.34 |
| 17031061800 | Census Tract 618 | SWMM_HEC | 0.14 | 0.42 | 0.34 |
| 17031031502 | Census Tract 315.02 | SWMM_HEC | 0.14 | 0.59 | 0.45 |
| 17031171000 | Census Tract 1710 | SWMM_HEC | 0.14 | 0.30 | 0.27 |
| 17031490800 | Census Tract 4908 | SWMM_HEC | 0.14 | 0.30 | 0.27 |
| 17031081300 | Census Tract 813 | SWMM_HEC | 0.14 | 0.58 | 0.27 |
| 17031823604 | Census Tract 8236.04 | SWMM_HEC | 0.14 | 0.47 | 0.28 |
| 17031010300 | Census Tract 103 | SWMM_HEC | 0.14 | 0.45 | 0.34 |
| 17031191301 | Census Tract 1913.01 | SWMM_HEC | 0.14 | 0.38 | 0.24 |
| 17031081202 | Census Tract 812.02 | SWMM_HEC | 0.14 | 0.70 | 0.26 |
| 17031283100 | Census Tract 2831 | SWMM_HEC | 0.14 | 0.45 | 0.45 |
| 17031490700 | Census Tract 4907 | SWMM_HEC | 0.14 | 0.34 | 0.32 |
| 17031031700 | Census Tract 317 | SWMM_HEC | 0.14 | 0.54 | 0.20 |
| 17031110200 | Census Tract 1102 | SWMM_HEC | 0.14 | 0.32 | 0.21 |
| 17031050200 | Census Tract 502 | SWMM_HEC | 0.14 | 0.38 | 0.32 |
| 17031010702 | Census Tract 107.02 | SWMM_HEC | 0.14 | 0.29 | 0.23 |
| 17031010100 | Census Tract 101 | SWMM_HEC | 0.14 | 0.43 | 0.27 |
| 17031030300 | Census Tract 303 | SWMM_HEC | 0.14 | 0.50 | 0.24 |
| 17031720600 | Census Tract 7206 | SWMM_HEC | 0.14 | 0.64 | 0.15 |
| 17031806201 | Census Tract 8062.01 | SWMM_HEC | 0.14 | 0.44 | 0.43 |
| 17031032100 | Census Tract 321 | SWMM_HEC | 0.14 | 0.48 | 0.34 |
| 17031711200 | Census Tract 7112 | SWMM_HEC | 0.14 | 0.30 | 0.23 |
| 17031830800 | Census Tract 8308 | SWMM_HEC | 0.14 | 0.35 | 0.24 |
| 17031071800 | Census Tract 718 | SWMM_HEC | 0.14 | 0.31 | 0.30 |
| 17031160300 | Census Tract 1603 | SWMM_HEC | 0.13 | 0.41 | 0.27 |
| 17031050100 | Census Tract 501 | SWMM_HEC | 0.13 | 0.29 | 0.22 |
| 17031281900 | Census Tract 2819 | SWMM_HEC | 0.13 | 0.40 | 0.30 |
| 17031491100 | Census Tract 4911 | SWMM_HEC | 0.13 | 0.32 | 0.32 |
| 17031050600 | Census Tract 506 | SWMM_HEC | 0.13 | 0.42 | 0.21 |
| 17031140701 | Census Tract 1407.01 | SWMM_HEC | 0.13 | 0.28 | 0.20 |
| 17031271500 | Census Tract 2715 | SWMM_HEC | 0.13 | 0.53 | 0.17 |
| 17031530502 | Census Tract 5305.02 | SWMM_HEC | 0.13 | 0.44 | 0.25 |
| 17031070102 | Census Tract 701.02 | SWMM_HEC | 0.13 | 0.45 | 0.27 |
| 17031070200 | Census Tract 702 | SWMM_HEC | 0.13 | 0.45 | 0.24 |
| 17031020901 | Census Tract 209.01 | SWMM_HEC | 0.13 | 0.39 | 0.30 |
| 17031060300 | Census Tract 603 | SWMM_HEC | 0.13 | 0.39 | 0.34 |
| 17031040201 | Census Tract 402.01 | SWMM_HEC | 0.13 | 0.39 | 0.30 |
| 17031170200 | Census Tract 1702 | SWMM_HEC | 0.13 | 0.28 | 0.24 |
| 17031062100 | Census Tract 621 | SWMM_HEC | 0.13 | 0.48 | 0.14 |
| 17031420400 | Census Tract 4204 | SWMM_HEC | 0.13 | 0.38 | 0.18 |
| 17031070101 | Census Tract 701.01 | SWMM_HEC | 0.13 | 0.40 | 0.24 |
| 17031010501 | Census Tract 105.01 | SWMM_HEC | 0.13 | 0.59 | 0.31 |
| 17031061000 | Census Tract 610 | SWMM_HEC | 0.13 | 0.32 | 0.30 |
| 17031833300 | Census Tract 8333 | SWMM_HEC | 0.13 | 0.43 | 0.39 |
| 17031062900 | Census Tract 629 | SWMM_HEC | 0.12 | 0.38 | 0.22 |
| 17031081500 | Census Tract 815 | SWMM_HEC | 0.12 | 0.69 | 0.47 |
| 17031040600 | Census Tract 406 | SWMM_HEC | 0.12 | 0.37 | 0.33 |
| 17031062600 | Census Tract 626 | SWMM_HEC | 0.12 | 0.38 | 0.33 |
| 17031063302 | Census Tract 633.02 | SWMM_HEC | 0.12 | 0.50 | 0.18 |
| 17031030400 | Census Tract 304 | SWMM_HEC | 0.12 | 0.40 | 0.36 |
| 17031829301 | Census Tract 8293.01 | SWMM_HEC | 0.12 | 0.47 | 0.20 |
| 17031824503 | Census Tract 8245.03 | SWMM_HEC | 0.12 | 0.53 | 0.26 |
| 17031222200 | Census Tract 2222 | SWMM_HEC | 0.12 | 0.44 | 0.26 |
| 17031030900 | Census Tract 309 | SWMM_HEC | 0.12 | 0.38 | 0.37 |
| 17031061200 | Census Tract 612 | SWMM_HEC | 0.12 | 0.25 | 0.15 |
| 17031071600 | Census Tract 716 | SWMM_HEC | 0.12 | 0.56 | 0.19 |
| 17031150600 | Census Tract 1506 | SWMM_HEC | 0.12 | 0.43 | 0.35 |
| 17031080201 | Census Tract 802.01 | SWMM_HEC | 0.12 | 0.59 | 0.14 |
| 17031031000 | Census Tract 310 | SWMM_HEC | 0.12 | 0.41 | 0.18 |
| 17031819200 | Census Tract 8192 | SWMM_HEC | 0.12 | 0.40 | 0.34 |
| 17031010502 | Census Tract 105.02 | SWMM_HEC | 0.12 | 0.40 | 0.36 |
| 17031062500 | Census Tract 625 | SWMM_HEC | 0.12 | 0.43 | 0.26 |
| 17031806202 | Census Tract 8062.02 | SWMM_HEC | 0.12 | 0.52 | 0.38 |
| 17031070500 | Census Tract 705 | SWMM_HEC | 0.12 | 0.38 | 0.24 |
| 17031832000 | Census Tract 8320 | SWMM_HEC | 0.11 | 0.43 | 0.21 |
| 17031063000 | Census Tract 630 | SWMM_HEC | 0.11 | 0.47 | 0.20 |
| 17031071100 | Census Tract 711 | SWMM_HEC | 0.11 | 0.49 | 0.29 |
| 17031071000 | Census Tract 710 | SWMM_HEC | 0.11 | 0.43 | 0.27 |
| 17031190701 | Census Tract 1907.01 | SWMM_HEC | 0.11 | 0.25 | 0.18 |
| 17031241400 | Census Tract 2414 | SWMM_HEC | 0.11 | 0.47 | 0.43 |
| 17031081100 | Census Tract 811 | SWMM_HEC | 0.11 | 0.54 | 0.35 |
| 17031061901 | Census Tract 619.01 | SWMM_HEC | 0.11 | 0.62 | 0.22 |
| 17031060100 | Census Tract 601 | SWMM_HEC | 0.11 | 0.38 | 0.23 |
| 17031081201 | Census Tract 812.01 | SWMM_HEC | 0.11 | 0.67 | 0.22 |
| 17031221000 | Census Tract 2210 | SWMM_HEC | 0.11 | 0.38 | 0.29 |
| 17031081403 | Census Tract 814.03 | SWMM_HEC | 0.11 | 0.48 | 0.24 |
| 17031063400 | Census Tract 634 | SWMM_HEC | 0.11 | 0.44 | 0.17 |
| 17031081700 | Census Tract 817 | SWMM_HEC | 0.11 | 0.42 | 0.20 |
| 17031062300 | Census Tract 623 | SWMM_HEC | 0.11 | 0.28 | 0.22 |
| 17031051200 | Census Tract 512 | SWMM_HEC | 0.10 | 0.43 | 0.28 |
| 17031062700 | Census Tract 627 | SWMM_HEC | 0.10 | 0.45 | 0.29 |
| 17031031900 | Census Tract 319 | SWMM_HEC | 0.10 | 0.37 | 0.26 |
| 17031062200 | Census Tract 622 | SWMM_HEC | 0.10 | 0.29 | 0.16 |
| 17031060200 | Census Tract 602 | SWMM_HEC | 0.10 | 0.41 | 0.22 |
| 17031080300 | Census Tract 803 | SWMM_HEC | 0.10 | 0.46 | 0.25 |
| 17031811500 | Census Tract 8115 | SWMM_HEC | 0.10 | 0.33 | 0.33 |
| 17031050700 | Census Tract 507 | SWMM_HEC | 0.10 | 0.39 | 0.29 |
| 17031070400 | Census Tract 704 | SWMM_HEC | 0.10 | 0.36 | 0.22 |
| 17031410500 | Census Tract 4105 | HAND | 0.10 | 0.38 | 0.34 |
| 17031824507 | Census Tract 8245.07 | HAND | 0.09 | 0.50 | 0.22 |
| 17031062400 | Census Tract 624 | HAND | 0.09 | 0.40 | 0.27 |
| 17031071300 | Census Tract 713 | HAND | 0.09 | 0.54 | 0.11 |
| 17031811600 | Census Tract 8116 | HAND | 0.09 | 0.32 | 0.29 |
| 17031070103 | Census Tract 701.03 | HAND | 0.09 | 0.61 | 0.15 |
| 17031031800 | Census Tract 318 | HAND | 0.09 | 0.40 | 0.17 |
| 17031061500 | Census Tract 615 | HAND | 0.09 | 0.35 | 0.18 |
| 17031070300 | Census Tract 703 | HAND | 0.08 | 0.37 | 0.28 |
| 17031824506 | Census Tract 8245.06 | HAND | 0.07 | 0.52 | 0.17 |
| 17031811401 | Census Tract 8114.01 | HAND | 0.06 | 0.27 | 0.23 |
| 17031802701 | Census Tract 8027.01 | HAND | 0.05 | 0.40 | 0.26 |
| 17031817700 | Census Tract 8177 | HAND | 0.04 | 0.45 | 0.18 |
| 17031820202 | Census Tract 8202.02 | HAND | 0.03 | 0.41 | 0.25 |
| 17031823806 | Census Tract 8238.06 | HAND | 0.03 | 0.51 | 0.26 |
| 17031830003 | Census Tract 8300.03 | HAND | 0.01 | 0.27 | 0.18 |
| 17031802607 | Census Tract 8026.07 | HAND | 0.00 | 0.51 | 0.23 |
| 17031803012 | Census Tract 8030.12 | HAND | 0.00 | 0.53 | 0.18 |
| 17031803604 | Census Tract 8036.04 | HAND | 0.00 | 0.35 | 0.20 |
| 17031804713 | Census Tract 8047.13 | HAND | 0.00 | 0.67 | 0.10 |
| 17031806300 | Census Tract 8063 | HAND | 0.00 | 0.39 | 0.29 |
| 17031823901 | Census Tract 8239.01 | HAND | 0.00 | 0.63 | 0.17 |
| 17031824115 | Census Tract 8241.15 | HAND | 0.00 | 0.56 | 0.14 |
| 17031820606 | Census Tract 8206.06 | HAND | 0.00 | 0.74 | 0.10 |
| 17031804705 | Census Tract 8047.05 | HAND | 0.00 | 0.50 | 0.16 |
| 17031804716 | Census Tract 8047.16 | HAND | 0.00 | 0.35 | 0.34 |
| 17031804808 | Census Tract 8048.08 | HAND | 0.00 | 0.36 | 0.30 |
| 17031805108 | Census Tract 8051.08 | HAND | 0.00 | 0.29 | 0.23 |
| 17031770601 | Census Tract 7706.01 | HAND | 0.00 | 0.33 | 0.30 |
| 17031803010 | Census Tract 8030.1 | HAND | 0.00 | 0.52 | 0.22 |
| 17031803300 | Census Tract 8033 | HAND | 0.00 | 0.49 | 0.12 |
| 17031819400 | Census Tract 8194 | HAND | 0.00 | 0.32 | 0.24 |
| 17031820104 | Census Tract 8201.04 | HAND | 0.00 | 0.46 | 0.14 |
| 17031818402 | Census Tract 8184.02 | HAND | 0.00 | 0.33 | 0.12 |
| 17031803702 | Census Tract 8037.02 | HAND | 0.00 | 0.50 | 0.29 |
| 17031804106 | Census Tract 8041.06 | HAND | 0.00 | 0.40 | 0.23 |
| 17031824107 | Census Tract 8241.07 | HAND | 0.00 | 0.27 | 0.22 |
| 17031803800 | Census Tract 8038 | HAND | 0.00 | 0.54 | 0.19 |
| 17031804710 | Census Tract 8047.1 | HAND | 0.00 | 0.59 | 0.08 |
| 17031802403 | Census Tract 8024.03 | HAND | 0.00 | 0.49 | 0.25 |
| 17031803014 | Census Tract 8030.14 | HAND | 0.00 | 0.39 | 0.22 |
| 17031823705 | Census Tract 8237.05 | HAND | 0.00 | 0.74 | 0.06 |
| 17031803008 | Census Tract 8030.08 | HAND | 0.00 | 0.43 | 0.23 |
| 17031824119 | Census Tract 8241.19 | HAND | 0.00 | 0.49 | 0.17 |
| 17031804608 | Census Tract 8046.08 | HAND | 0.00 | 0.53 | 0.14 |
| 17031820000 | Census Tract 8200 | HAND | 0.00 | 0.49 | 0.33 |
| 17031770300 | Census Tract 7703 | HAND | 0.00 | 0.50 | 0.19 |
| 17031802503 | Census Tract 8025.03 | HAND | 0.00 | 0.44 | 0.17 |
| 17031802900 | Census Tract 8029 | HAND | 0.00 | 0.46 | 0.22 |
| 17031803007 | Census Tract 8030.07 | HAND | 0.00 | 0.45 | 0.13 |
| 17031803200 | Census Tract 8032 | HAND | 0.00 | 0.47 | 0.19 |
| 17031803500 | Census Tract 8035 | HAND | 0.00 | 0.45 | 0.21 |
| 17031803610 | Census Tract 8036.1 | HAND | 0.00 | 0.46 | 0.24 |
| 17031804000 | Census Tract 8040 | HAND | 0.00 | 0.50 | 0.18 |
| 17031804108 | Census Tract 8041.08 | HAND | 0.00 | 0.55 | 0.23 |
| 17031818401 | Census Tract 8184.01 | HAND | 0.00 | 0.49 | 0.13 |
| 17031818500 | Census Tract 8185 | HAND | 0.00 | 0.45 | 0.27 |
| 17031819801 | Census Tract 8198.01 | HAND | 0.00 | 0.60 | 0.09 |
| 17031820103 | Census Tract 8201.03 | HAND | 0.00 | 0.51 | 0.12 |
| 17031770500 | Census Tract 7705 | HAND | 0.00 | 0.39 | 0.28 |
| 17031770400 | Census Tract 7704 | HAND | 0.00 | 0.39 | 0.23 |
| 17031811701 | Census Tract 8117.01 | HAND | 0.00 | 0.32 | 0.30 |
| 17031811800 | Census Tract 8118 | HAND | 0.00 | 0.37 | 0.24 |
| 17031820605 | Census Tract 8206.05 | HAND | 0.00 | 0.48 | 0.30 |
| 17031823904 | Census Tract 8239.04 | HAND | 0.00 | 0.63 | 0.11 |
| 17031824105 | Census Tract 8241.05 | HAND | 0.00 | 0.42 | 0.19 |
| 17031824114 | Census Tract 8241.14 | HAND | 0.00 | 0.58 | 0.18 |
| 17031824120 | Census Tract 8241.2 | HAND | 0.00 | 0.52 | 0.20 |
| 17031804201 | Census Tract 8042.01 | SWMM_HEC | 0.00 | 0.66 | 0.13 |
| 17031804606 | Census Tract 8046.06 | SWMM_HEC | 0.00 | 0.38 | 0.24 |
| 17031804609 | Census Tract 8046.09 | SWMM_HEC | 0.00 | 0.47 | 0.23 |
| 17031804611 | Census Tract 8046.11 | SWMM_HEC | 0.00 | 0.56 | 0.13 |
| 17031804715 | Census Tract 8047.15 | SWMM_HEC | 0.00 | 0.42 | 0.12 |
| 17031804809 | Census Tract 8048.09 | SWMM_HEC | 0.00 | 0.33 | 0.25 |
| 17031805109 | Census Tract 8051.09 | SWMM_HEC | 0.00 | 0.47 | 0.15 |
| 17031805111 | Census Tract 8051.11 | SWMM_HEC | 0.00 | 0.36 | 0.31 |
| 17031805002 | Census Tract 8050.02 | SWMM_HEC | 0.00 | 0.43 | 0.13 |
| 17031802608 | Census Tract 8026.08 | SWMM_HEC | 0.00 | 0.44 | 0.21 |
| 17031802404 | Census Tract 8024.04 | SWMM_HEC | 0.00 | 0.39 | 0.32 |
| 17031802802 | Census Tract 8028.02 | SWMM_HEC | 0.00 | 0.37 | 0.30 |
| 17031803005 | Census Tract 8030.05 | SWMM_HEC | 0.00 | 0.46 | 0.11 |
| 17031803016 | Census Tract 8030.16 | SWMM_HEC | 0.00 | 0.46 | 0.17 |
| 17031803100 | Census Tract 8031 | SWMM_HEC | 0.00 | 0.58 | 0.08 |
| 17031819600 | Census Tract 8196 | SWMM_HEC | 0.00 | 0.47 | 0.25 |
| 17031819700 | Census Tract 8197 | SWMM_HEC | 0.00 | 0.43 | 0.20 |
| 17031819802 | Census Tract 8198.02 | SWMM_HEC | 0.00 | 0.52 | 0.09 |
| 17031820101 | Census Tract 8201.01 | SWMM_HEC | 0.00 | 0.60 | 0.16 |
| 17031818300 | Census Tract 8183 | SWMM_HEC | 0.00 | 0.48 | 0.10 |
| 17031804810 | Census Tract 8048.1 | SWMM_HEC | 0.00 | 0.60 | 0.10 |
| 17031805001 | Census Tract 8050.01 | SWMM_HEC | 0.00 | 0.45 | 0.28 |
| 17031804805 | Census Tract 8048.05 | SWMM_HEC | 0.00 | 0.41 | 0.14 |
| 17031804807 | Census Tract 8048.07 | SWMM_HEC | 0.00 | 0.56 | 0.13 |
| 17031803605 | Census Tract 8036.05 | SWMM_HEC | 0.00 | 0.49 | 0.12 |
| 17031804803 | Census Tract 8048.03 | SWMM_HEC | 0.00 | 0.48 | 0.17 |
| 17031811301 | Census Tract 8113.01 | SWMM_HEC | 0.00 | 0.32 | 0.22 |
| 17031820201 | Census Tract 8202.01 | SWMM_HEC | 0.00 | 0.57 | 0.20 |
| 17031804603 | Census Tract 8046.03 | SWMM_HEC | 0.00 | 0.46 | 0.25 |
| 17031804607 | Census Tract 8046.07 | SWMM_HEC | 0.00 | 0.42 | 0.19 |
| 17031804701 | Census Tract 8047.01 | SWMM_HEC | 0.00 | 0.43 | 0.19 |
| 17031804709 | Census Tract 8047.09 | SWMM_HEC | 0.00 | 0.47 | 0.11 |
| 17031804711 | Census Tract 8047.11 | SWMM_HEC | 0.00 | 0.40 | 0.17 |
| 17031804712 | Census Tract 8047.12 | SWMM_HEC | 0.00 | 0.52 | 0.13 |
| 17197881007 | Census Tract 1668810.07 | SWMM_HEC | 0.00 | 0.61 | 0.13 |
| 17031824113 | Census Tract 8241.13 | SWMM_HEC | 0.00 | 0.41 | 0.26 |
| 17031824117 | Census Tract 8241.17 | SWMM_HEC | 0.00 | 0.38 | 0.17 |
| 17031823903 | Census Tract 8239.03 | SWMM_HEC | 0.00 | 0.63 | 0.14 |
| 17031824003 | Census Tract 8240.03 | SWMM_HEC | 0.00 | 0.56 | 0.12 |
| 17031824006 | Census Tract 8240.06 | SWMM_HEC | 0.00 | 0.56 | 0.16 |
| 17031824106 | Census Tract 8241.06 | SWMM_HEC | 0.00 | 0.44 | 0.18 |
| 17031823704 | Census Tract 8237.04 | SWMM_HEC | 0.00 | 0.64 | 0.10 |
| 17031823801 | Census Tract 8238.01 | SWMM_HEC | 0.00 | 0.57 | 0.15 |
| 17031804105 | Census Tract 8041.05 | SWMM_HEC | 0.00 | 0.50 | 0.23 |
| 17031803901 | Census Tract 8039.01 | SWMM_HEC | 0.00 | 0.37 | 0.27 |
| 17031804102 | Census Tract 8041.02 | SWMM_HEC | 0.00 | 0.57 | 0.16 |
| 17031804109 | Census Tract 8041.09 | SWMM_HEC | 0.00 | 0.63 | 0.19 |
| 17031804202 | Census Tract 8042.02 | SWMM_HEC | 0.00 | 0.48 | 0.21 |
| 17031803608 | Census Tract 8036.08 | SWMM_HEC | 0.00 | 0.53 | 0.19 |
| 17031803611 | Census Tract 8036.11 | SWMM_HEC | 0.00 | 0.44 | 0.25 |
| 17031803612 | Census Tract 8036.12 | SWMM_HEC | 0.00 | 0.49 | 0.21 |
| 17031805107 | Census Tract 8051.07 | SWMM_HEC | 0.00 | 0.38 | 0.19 |
| 17031805110 | Census Tract 8051.1 | SWMM_HEC | 0.00 | 0.44 | 0.21 |
| 17197883514 | Census Tract 1668835.14 | SWMM_HEC | 0.00 | 0.34 | 0.11 |
| 17031803013 | Census Tract 8030.13 | SWMM_HEC | 0.00 | 0.43 | 0.12 |
| 17031816800 | Census Tract 8168 | SWMM_HEC | 0.00 | 0.44 | 0.18 |
| 17031803603 | Census Tract 8036.03 | SWMM_HEC | 0.00 | 0.55 | 0.22 |
| 17031804104 | Census Tract 8041.04 | SWMM_HEC | 0.00 | 0.48 | 0.15 |
| 17031804706 | Census Tract 8047.06 | SWMM_HEC | 0.00 | 0.66 | 0.06 |
| 17031804804 | Census Tract 8048.04 | SWMM_HEC | 0.00 | 0.37 | 0.36 |
| 17031770202 | Census Tract 7702.02 | SWMM_HEC | 0.00 | 0.37 | 0.26 |
| 17031824005 | Census Tract 8240.05 | SWMM_HEC | 0.00 | 0.55 | 0.22 |
| 17031824116 | Census Tract 8241.16 | SWMM_HEC | 0.00 | 0.46 | 0.14 |
| 17031823702 | Census Tract 8237.02 | SWMM_HEC | 0.00 | 0.61 | 0.15 |
| 17031824108 | Census Tract 8241.08 | SWMM_HEC | 0.00 | 0.39 | 0.22 |
| 17031770602 | Census Tract 7706.02 | SWMM_HEC | 0.00 | 0.32 | 0.32 |
| 17031804714 | Census Tract 8047.14 | SWMM_HEC | 0.00 | 0.54 | 0.18 |
| 17031824004 | Census Tract 8240.04 | SWMM_HEC | 0.00 | 0.54 | 0.21 |
| 17031803902 | Census Tract 8039.02 | SWMM_HEC | 0.00 | 0.45 | 0.19 |
| 17031819000 | Census Tract 8190 | SWMM_HEC | 0.00 | 0.47 | 0.30 |
| 17031804901 | Census Tract 8049.01 | SWMM_HEC | 0.00 | 0.37 | 0.29 |
| 17031806103 | Census Tract 8061.03 | SWMM_HEC | 0.00 | 0.38 | 0.27 |
| 17031770201 | Census Tract 7702.01 | SWMM_HEC | 0.00 | 0.36 | 0.26 |
| 17031803017 | Census Tract 8030.17 | SWMM_HEC | 0.00 | 0.47 | 0.23 |
| 17031803607 | Census Tract 8036.07 | SWMM_HEC | 0.00 | 0.34 | 0.28 |

1. **CNN-SAR model description**

To accurately identify surface water inundation over the Chicago region during flood events, we developed a convolutional neural network (CNN)-based classification framework using Sentinel-1 synthetic aperture radar (SAR) imagery (Sharma and Saharia 2025). The approach leverages both ascending and descending passes to ensure complete spatial coverage and enhance flood detection sensitivity. Please note that for this manuscript, we have taken July 02, 2023, heavy rainfall event. The rest of the dates are tested to check the validity of CNN-SAR model.

**Data preparation and tiling**

To prepare inputs for the convolutional neural network (CNN), Sentinel-1 Ground Range Detected (GRD) images at 10 m pixel spacing were acquired from Google Earth Engine and preprocessed using standard workflows (radiometric calibration, terrain correction, and speckle filtering with the Refined Lee filter). Ground truth binary flood masks were generated by manually delineating inundated areas using a combination of contemporaneous high-resolution optical imagery (e.g., Landsat and Sentinel-2), flood reports, and ancillary reference maps (Isikdogan et al. 2017; Goffi et al. 2020). Each SAR image and its associated flood mask were divided into 512 × 512-pixel tiles, corresponding to ~5.1 × 5.1 km on the ground. A stride of 512 was chosen to ensure non-overlapping tiles, reduce redundancy in training samples, and maintain computational efficiency. Although smaller strides could have introduced additional robustness by increasing training diversity, they were not adopted here due to the significant increase in memory requirements and training time (Li and Demir 2023; Feng et al. 2015). Figure S1 illustrates the end-to-end workflow; the “CNN Algorithm” block specifically refers to the CNN-based binary segmentation module applied to each tile.

**CNN model development and training**

We implemented a CNN model designed for binary flood segmentation, trained from scratch on SAR tiles and their corresponding binary masks. The network was optimized using the Adam optimizer and a binary cross-entropy loss function, with training carried out over 25 epochs. Training and validation accuracies ranged from 68% to 88%, with validation accuracy stabilizing during the first 10-12 epochs, likely reflecting the strong separability between flood and non-flood backscatter signals in SAR imagery. Beyond epoch 15, training accuracy continued to rise, while validation accuracy exhibited fluctuations (see Figure S2). These patterns, including the spikes in validation loss observed at epochs 20 and 24, may indicate the onset of overfitting. To mitigate this, we employed dropout regularization in intermediate layers, early stopping based on validation loss and ensured that training and validation data were separated by flood event rather than by tile, minimizing spatial autocorrelation leakage (S et al. 2025). Despite these efforts, some residual variability remained in the validation curves, which highlights the challenges of learning spatially heterogeneous flood signals. Future work may explore additional augmentation strategies, such as rotations and random cropping, to further improve generalization.

**Full-scene prediction and reconstruction**

After training, the CNN was applied to full Sentinel-1 scenes for flood events in the Chicago metropolitan area. Each full scene was partitioned into 512 × 512 tiles, predictions were generated for each tile, and outputs were mosaicked back into full-resolution binary flood maps using the original geospatial metadata. This procedure ensured spatial continuity and allowed seamless integration with GIS-based hydrological and infrastructural layers. The workflow for full-scene prediction and reconstruction is summarized in Fig. S1, which illustrates the transition from preprocessing through CNN segmentation to geospatial output assembly.

**Accuracy assessment**

Model outputs were evaluated against high-quality ground truth flood maps generated independently from Sentinel-2 optical imagery, manual interpretation of very-high-resolution aerial photographs, and corroborated with official flood reports (Sharma and Saharia 2025). These maps were available for six flood dates across three focus areas (2019–2023) and provided a reliable benchmark for assessing model accuracy. Table S2 summarizes event-wise performance, with overall accuracy averaging ~81.2%. While these validation datasets were essential for testing CNN reliability, they were not incorporated into the broader temporal analysis in the main manuscript due to their limited spatial and temporal coverage. Instead, they are presented here as supplementary evidence of the CNN ability to reproduce flood extents with reasonable accuracy.

**Table S2 | CNN-SAR algorithm accuracy statistics for different events.** Accuracy assessment of CNN-derived flood maps for selected flood events in the Chicago metropolitan area (2019–2023).

| **Event Date** | **Accuracy** | **Event Date** | **Accuracy** |
| --- | --- | --- | --- |
| 09-Mar-19 | 0.8843 | 20-May-19 | 0.8338 |
| 14-Apr-19 | 0.7403 | 01-Jun-19 | 0.8922 |
| 08-May-19 | 0.8638 | 02-Jul-23 | 0.8131 |

**
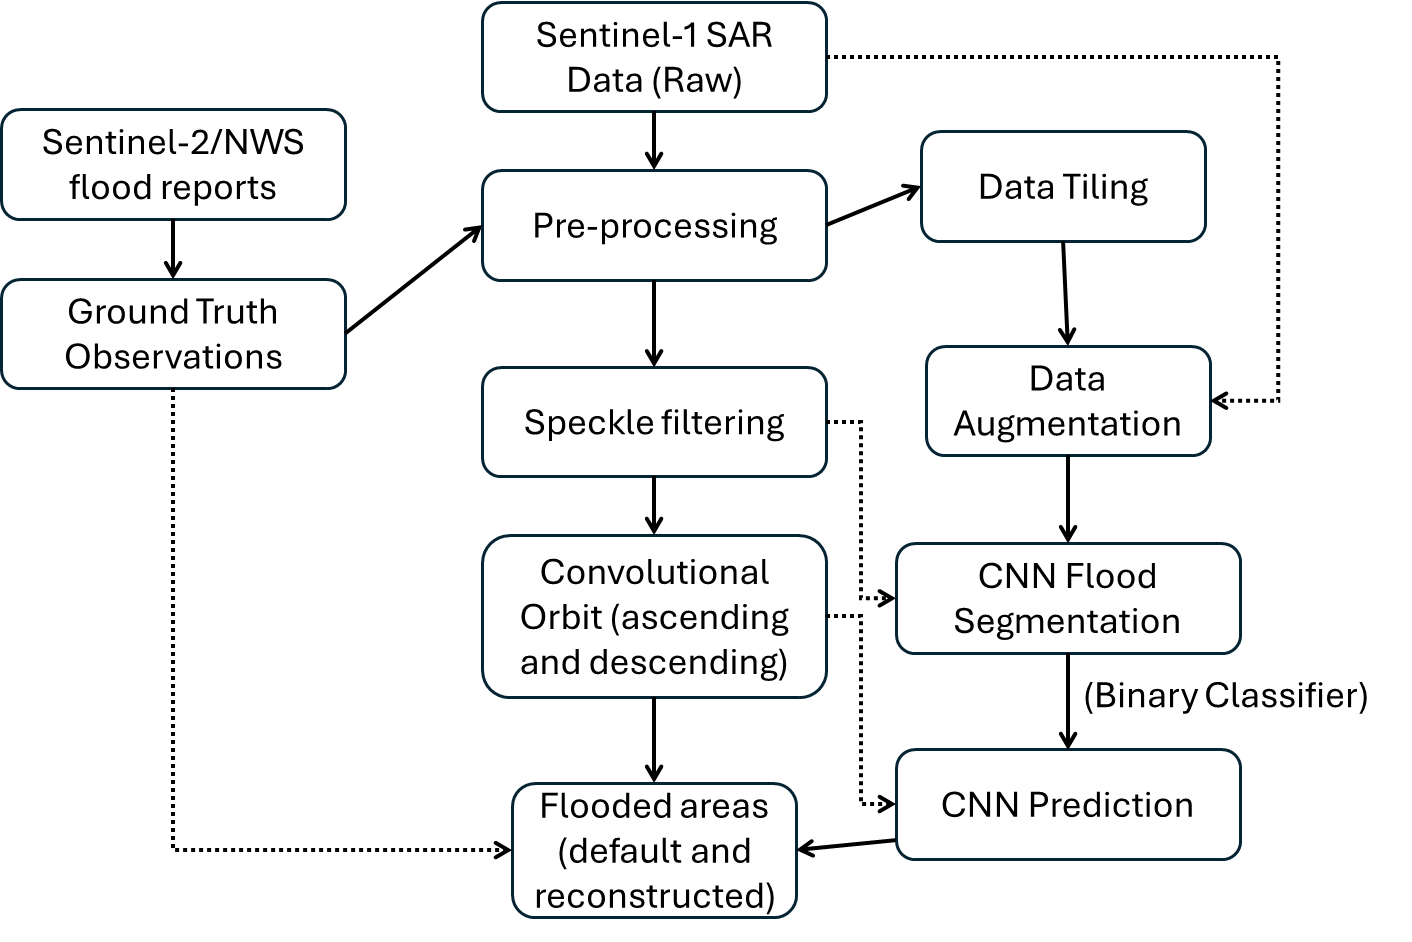
**

**Fig. S1 |** **Methodological workflow for generating flood inundation maps**. Workflow using Sentinel-1 SAR data and a CNN-based flood segmentation framework. Raw SAR images were preprocessed (calibration, terrain correction, and speckle filtering), paired with ground truth binary flood masks, and tiled into 512 × 512 patches (~5.1 × 5.1 km).


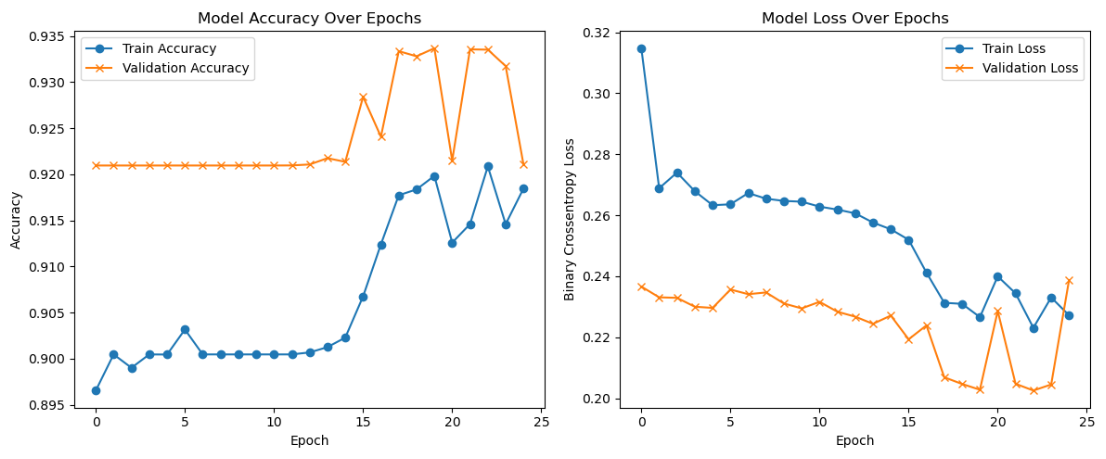


**Fig. S2 | Performance of the CNN-SAR model.** Epochs-based statistics developed using satellite data obtained for flood events selected for the analysis in the manuscript.

**References:**

Feng, Q., J. Gong, J. Liu, and Y. Li, 2015: Flood Mapping Based on Multiple Endmember Spectral Mixture Analysis and Random Forest Classifier—The Case of Yuyao, China. *Remote Sens (Basel)*, 7, 12539–12562, https://doi.org/10.3390/rs70912539.

Goffi, A., D. Stroppiana, P. A. Brivio, G. Bordogna, and M. Boschetti, 2020: Towards an automated approach to map flooded areas from Sentinel-2 MSI data and soft integration of water spectral features. *International Journal of Applied Earth Observation and Geoinformation*, 84, 101951, https://doi.org/10.1016/j.jag.2019.101951.

Isikdogan, F., A. C. Bovik, and P. Passalacqua, 2017: Surface Water Mapping by Deep Learning. *IEEE J Sel Top Appl Earth Obs Remote Sens*, 10, 4909–4918, https://doi.org/10.1109/JSTARS.2017.2735443.

Li, Z., and I. Demir, 2023: U-net-based semantic classification for flood extent extraction using SAR imagery and GEE platform: A case study for 2019 central US flooding. *Science of The Total Environment*, 869, 161757, https://doi.org/10.1016/j.scitotenv.2023.161757.

S, G., S. G, and S. P, 2025: Flood extent mapping in SAR images using semi-supervised approach. *Results in Engineering*, 26, 105304, https://doi.org/10.1016/j.rineng.2025.105304.

Sharma, N. K., and M. Saharia, 2025: DeepSARFlood: Rapid and automated SAR-based flood inundation mapping using vision transformer-based deep ensembles with uncertainty estimates. *Science of Remote Sensing*, 11, 100203, https://doi.org/10.1016/j.srs.2025.100203.
